# Supplementary material
Source: PubMed Central journal article supplement (PMC4203550)
Supplement: auto-10-1241-s01.pdf [file auto-10-1241-s01.pdf]

## **Supplemental Material to:**

**Rui Liu, Jingyi Li, Tao Zhang, Linzhi Zou, Yi Chen, Kui Wang,  
Yunlong Lei, Kefei Yuan, Yi Li, Jiang Lan, Lin Cheng,  
Na Xie, Rong Xiang, Edouard C Nice, Canhua Huang,  
and YuquanWei**

**Itraconazole suppresses the growth of glioblastoma  
through induction of autophagy: Involvement of  
abnormal cholesterol trafficking**

**Autophagy 2014; 10(7)**

**<http://dx.doi.org/10.4161/auto.28912>**

**[www.landesbioscience.com/journals/autophagy/article/28912](http://www.landesbioscience.com/journals/autophagy/article/28912)**

Figure S1

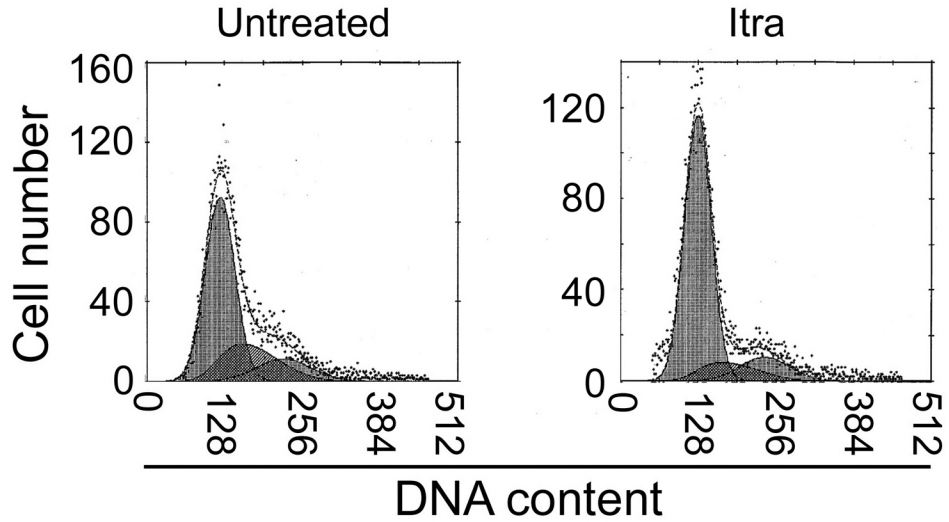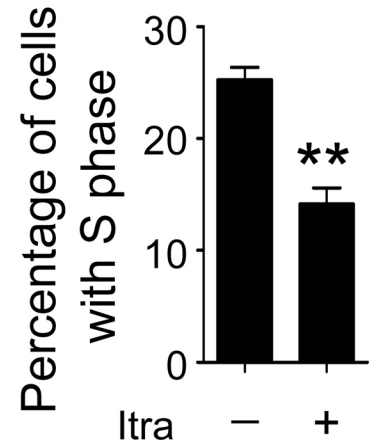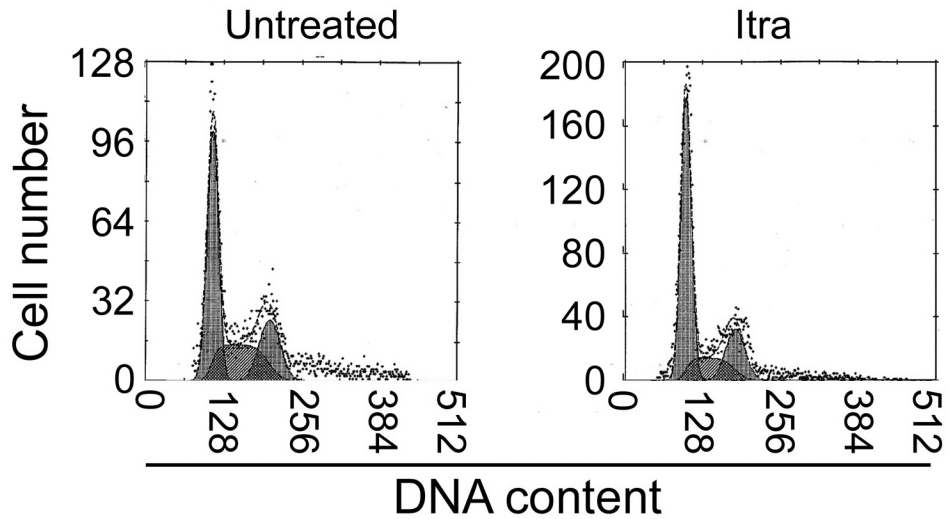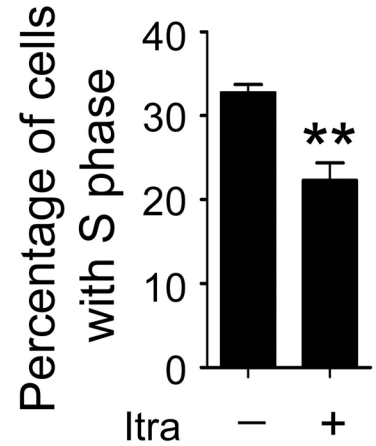

**A**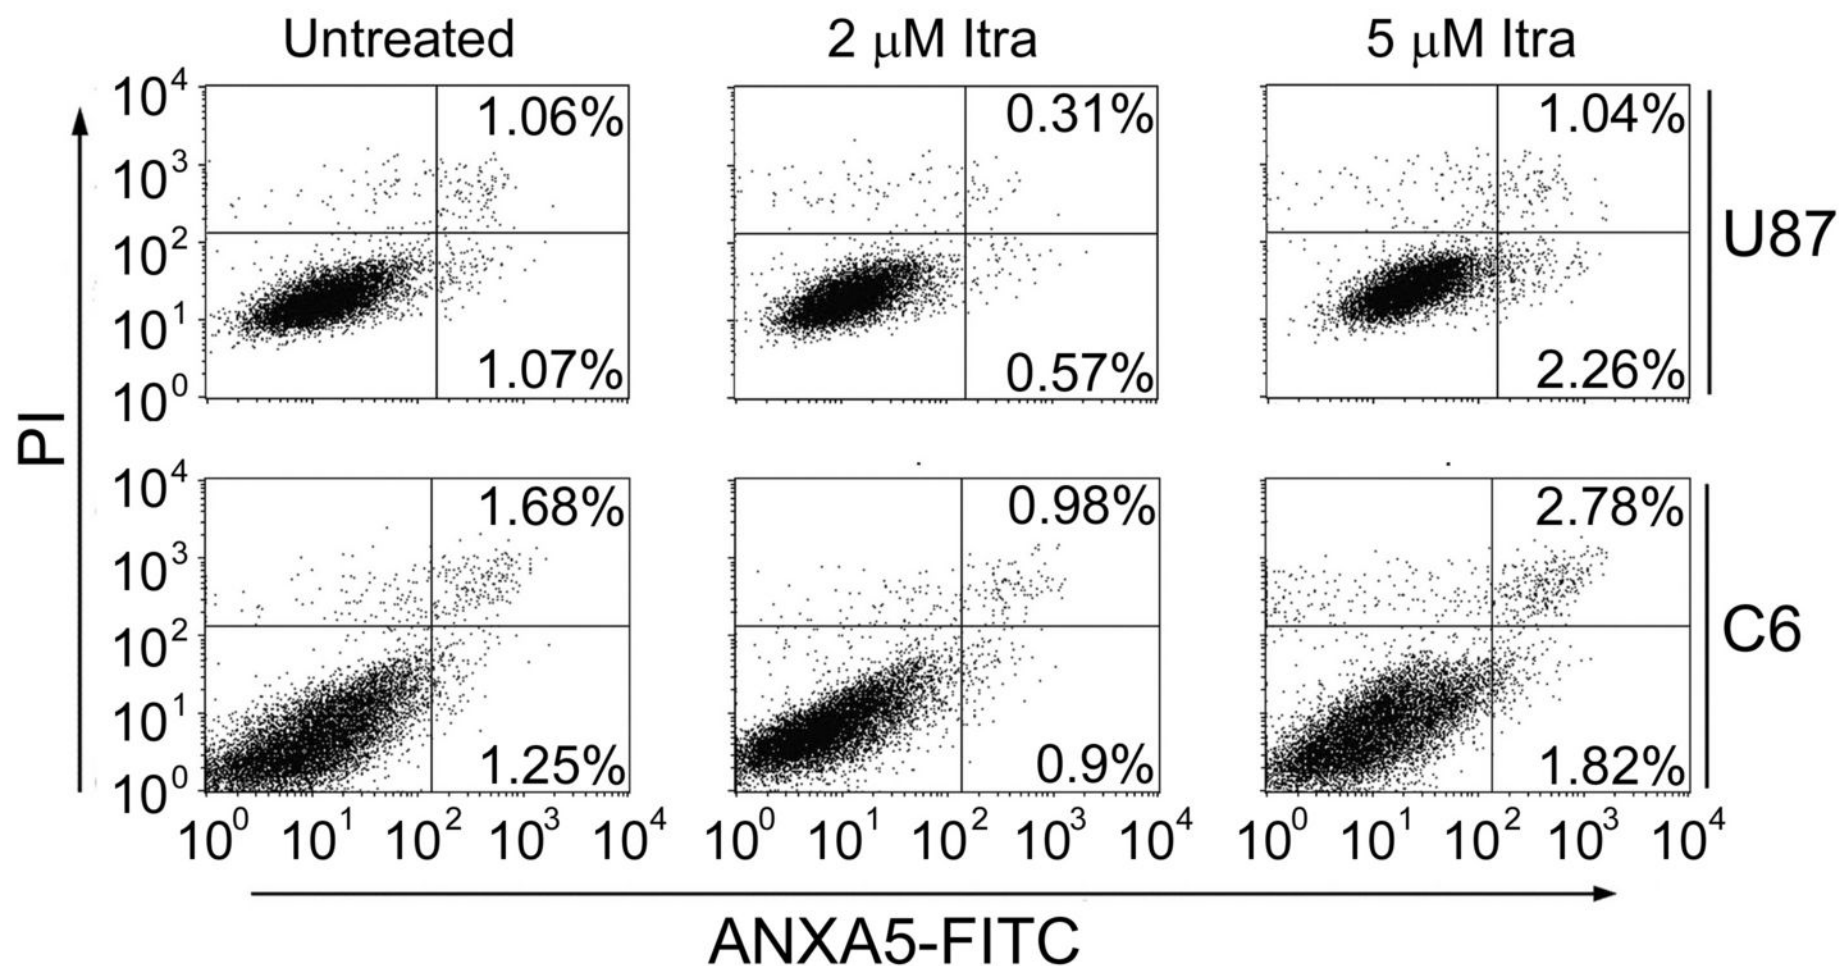**B**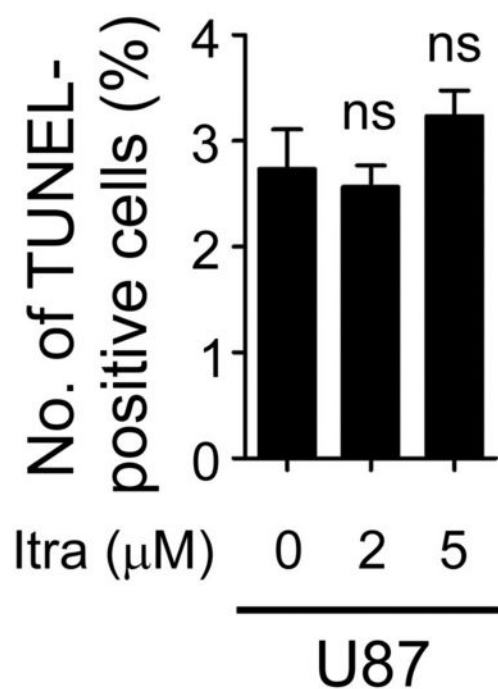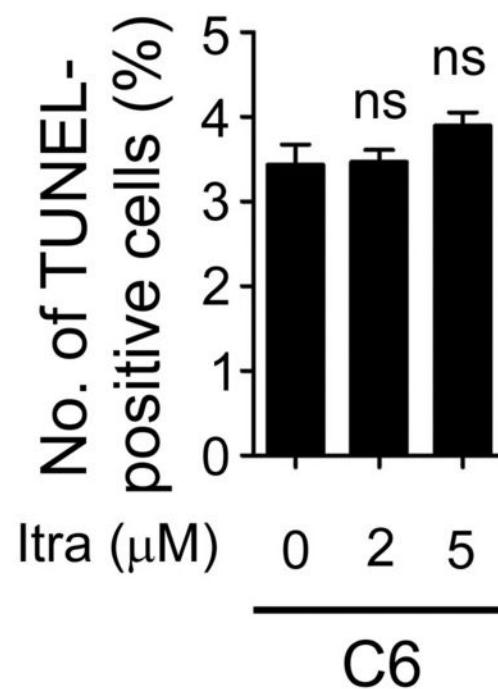

Figure S3

**A**

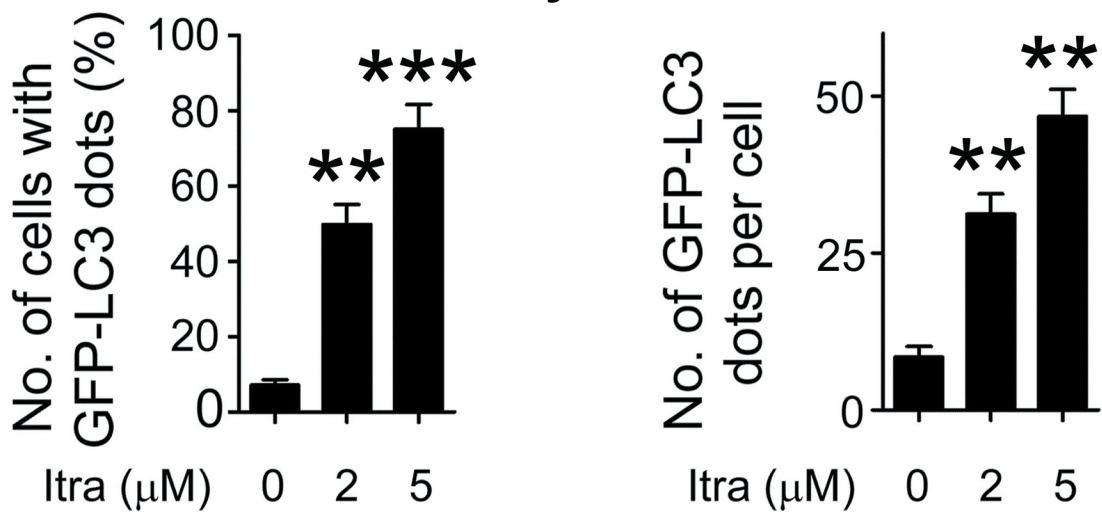

**B**

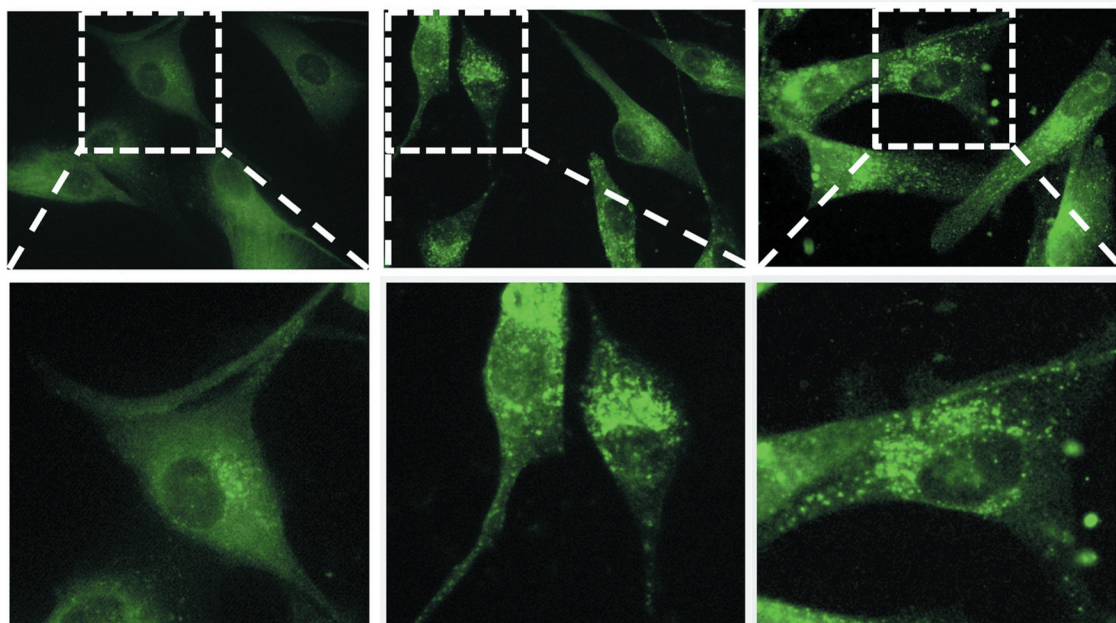

DMSO

2 μM Itra

5 μM Itra

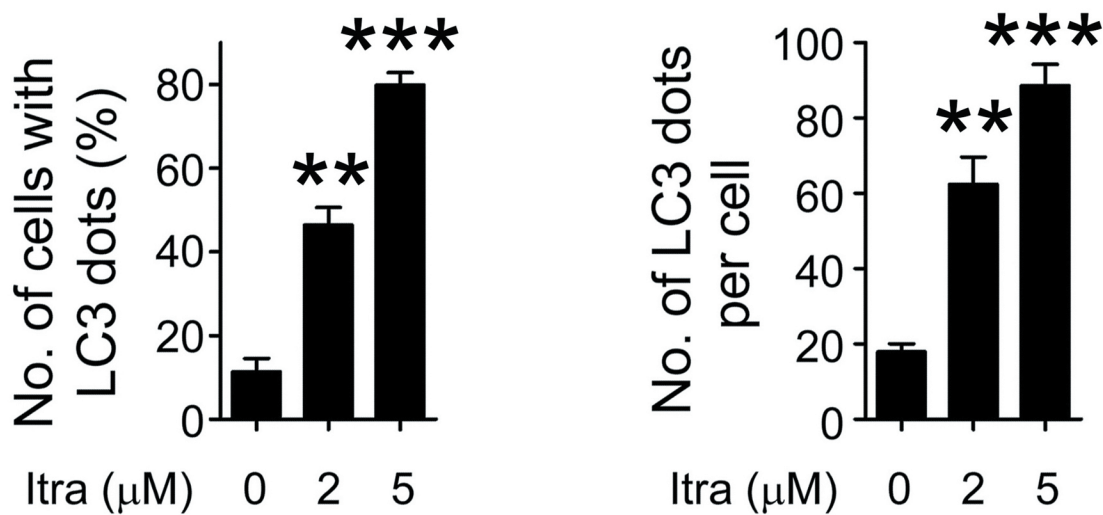



A

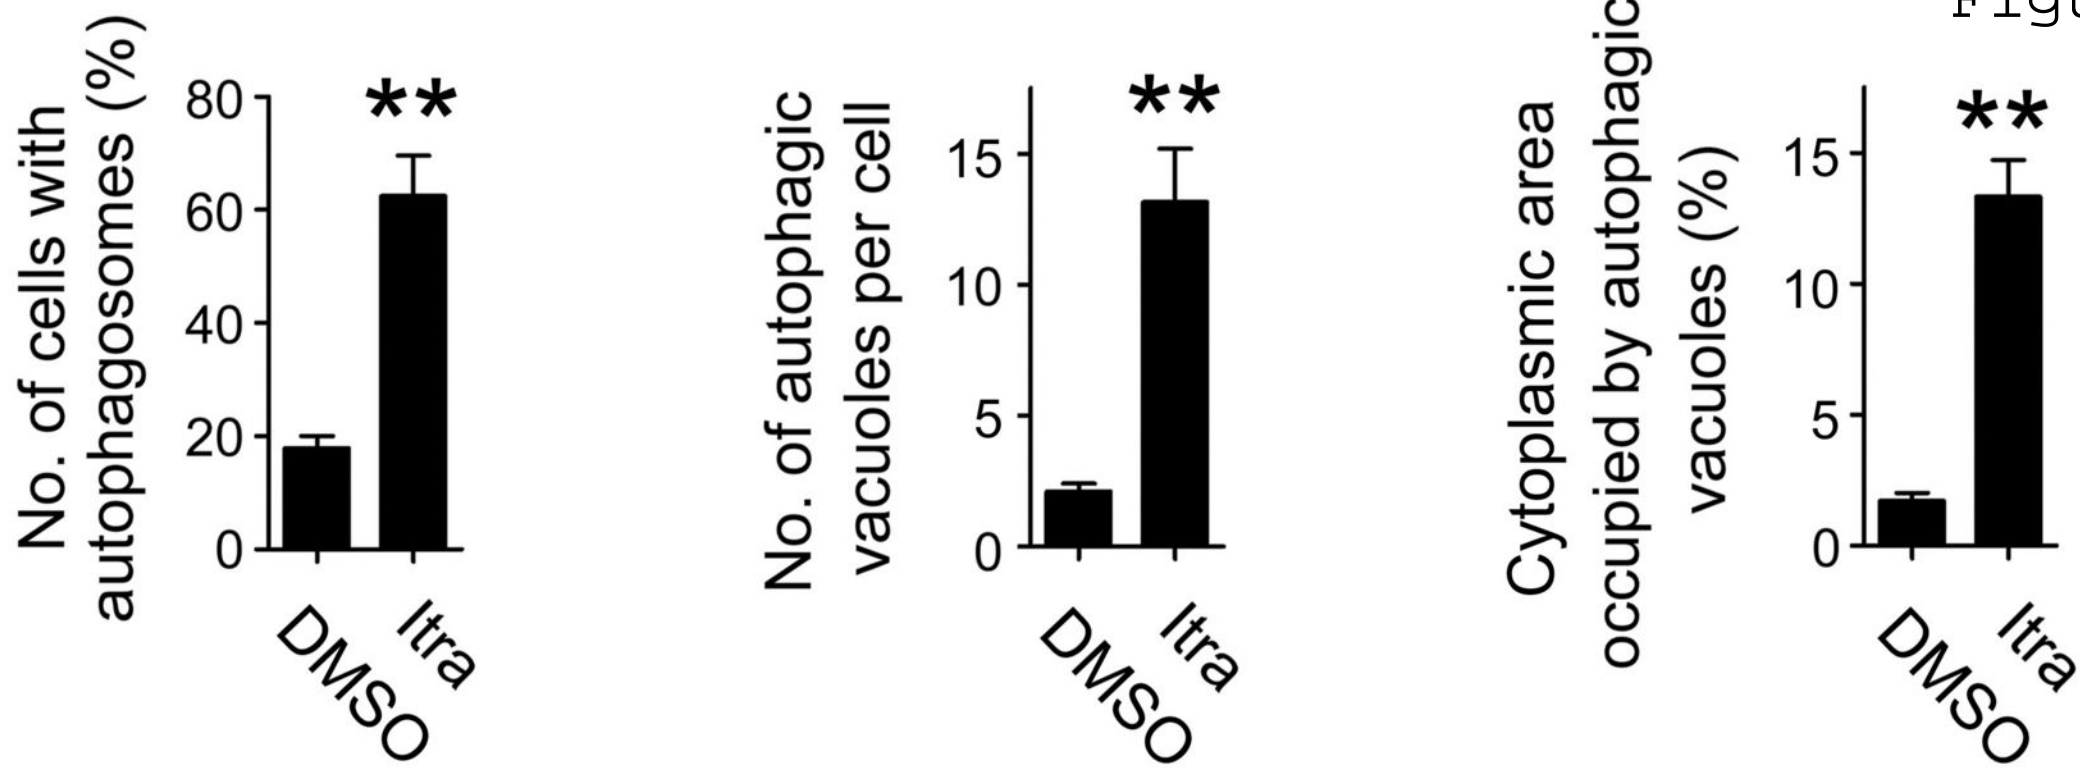

B

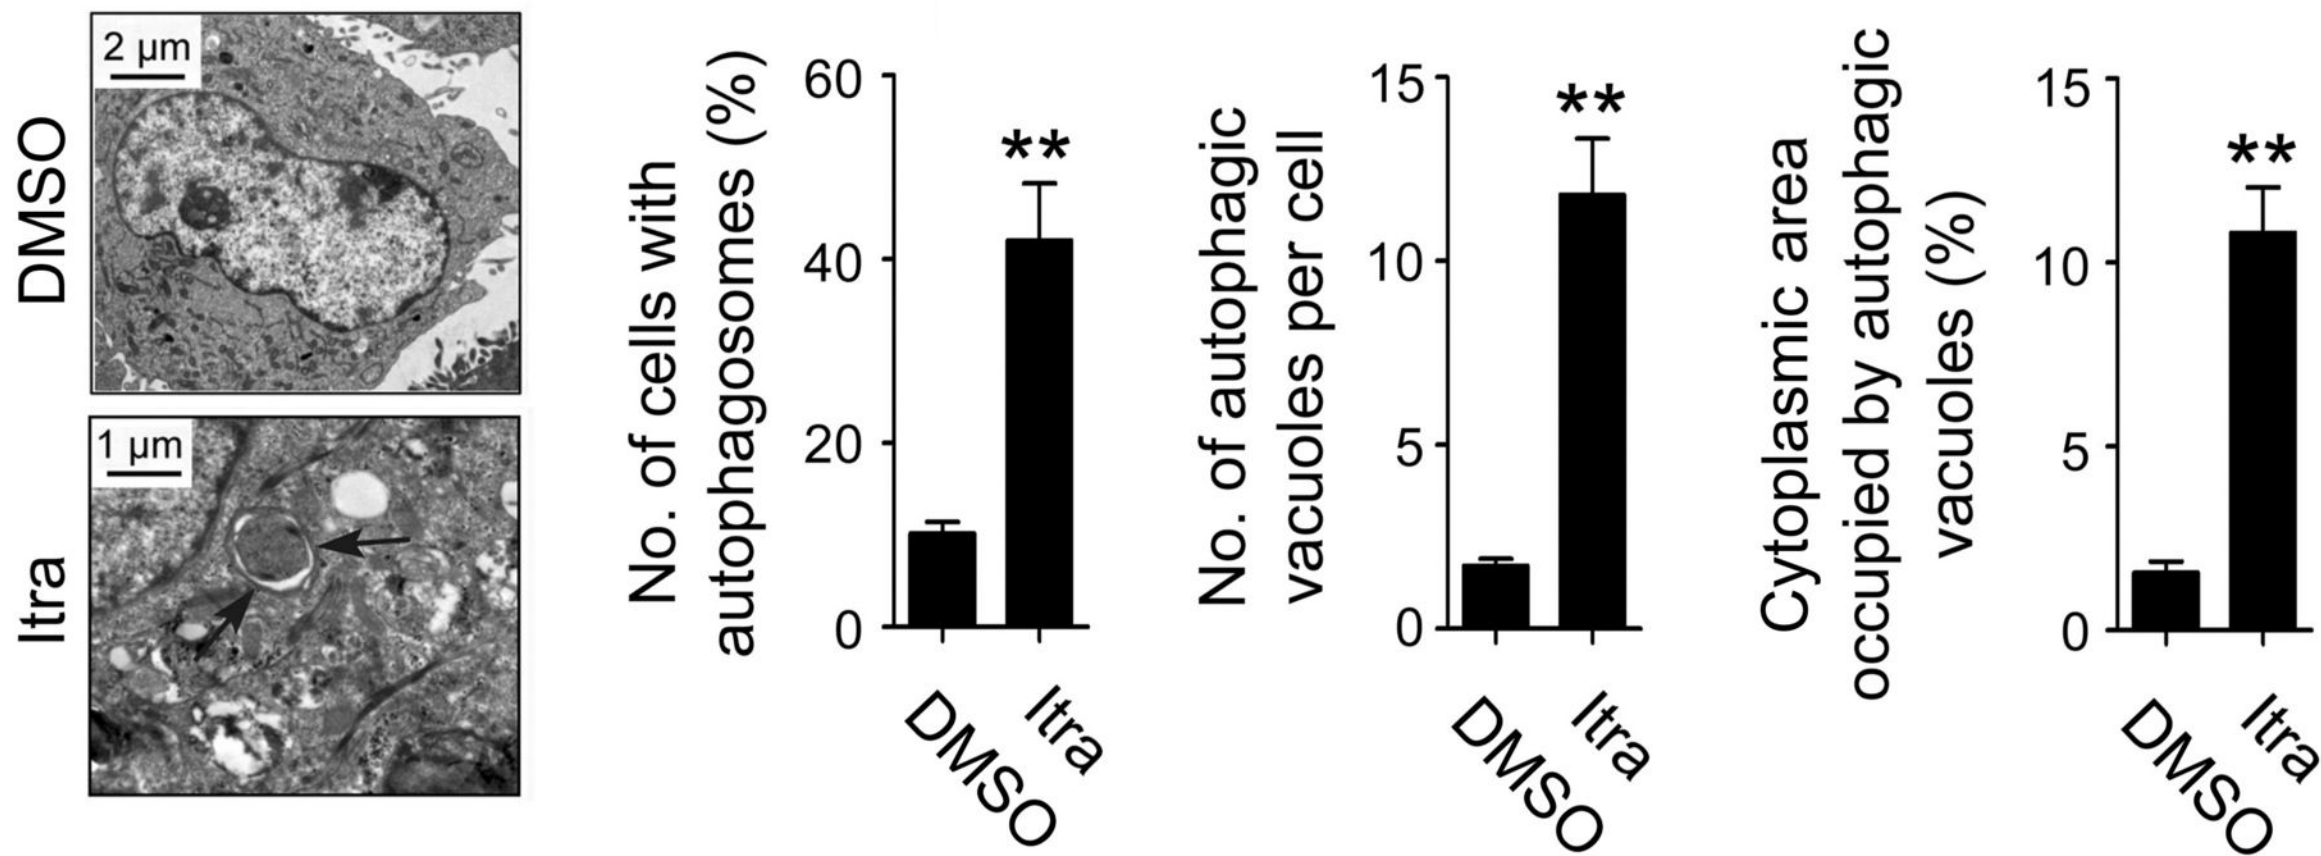

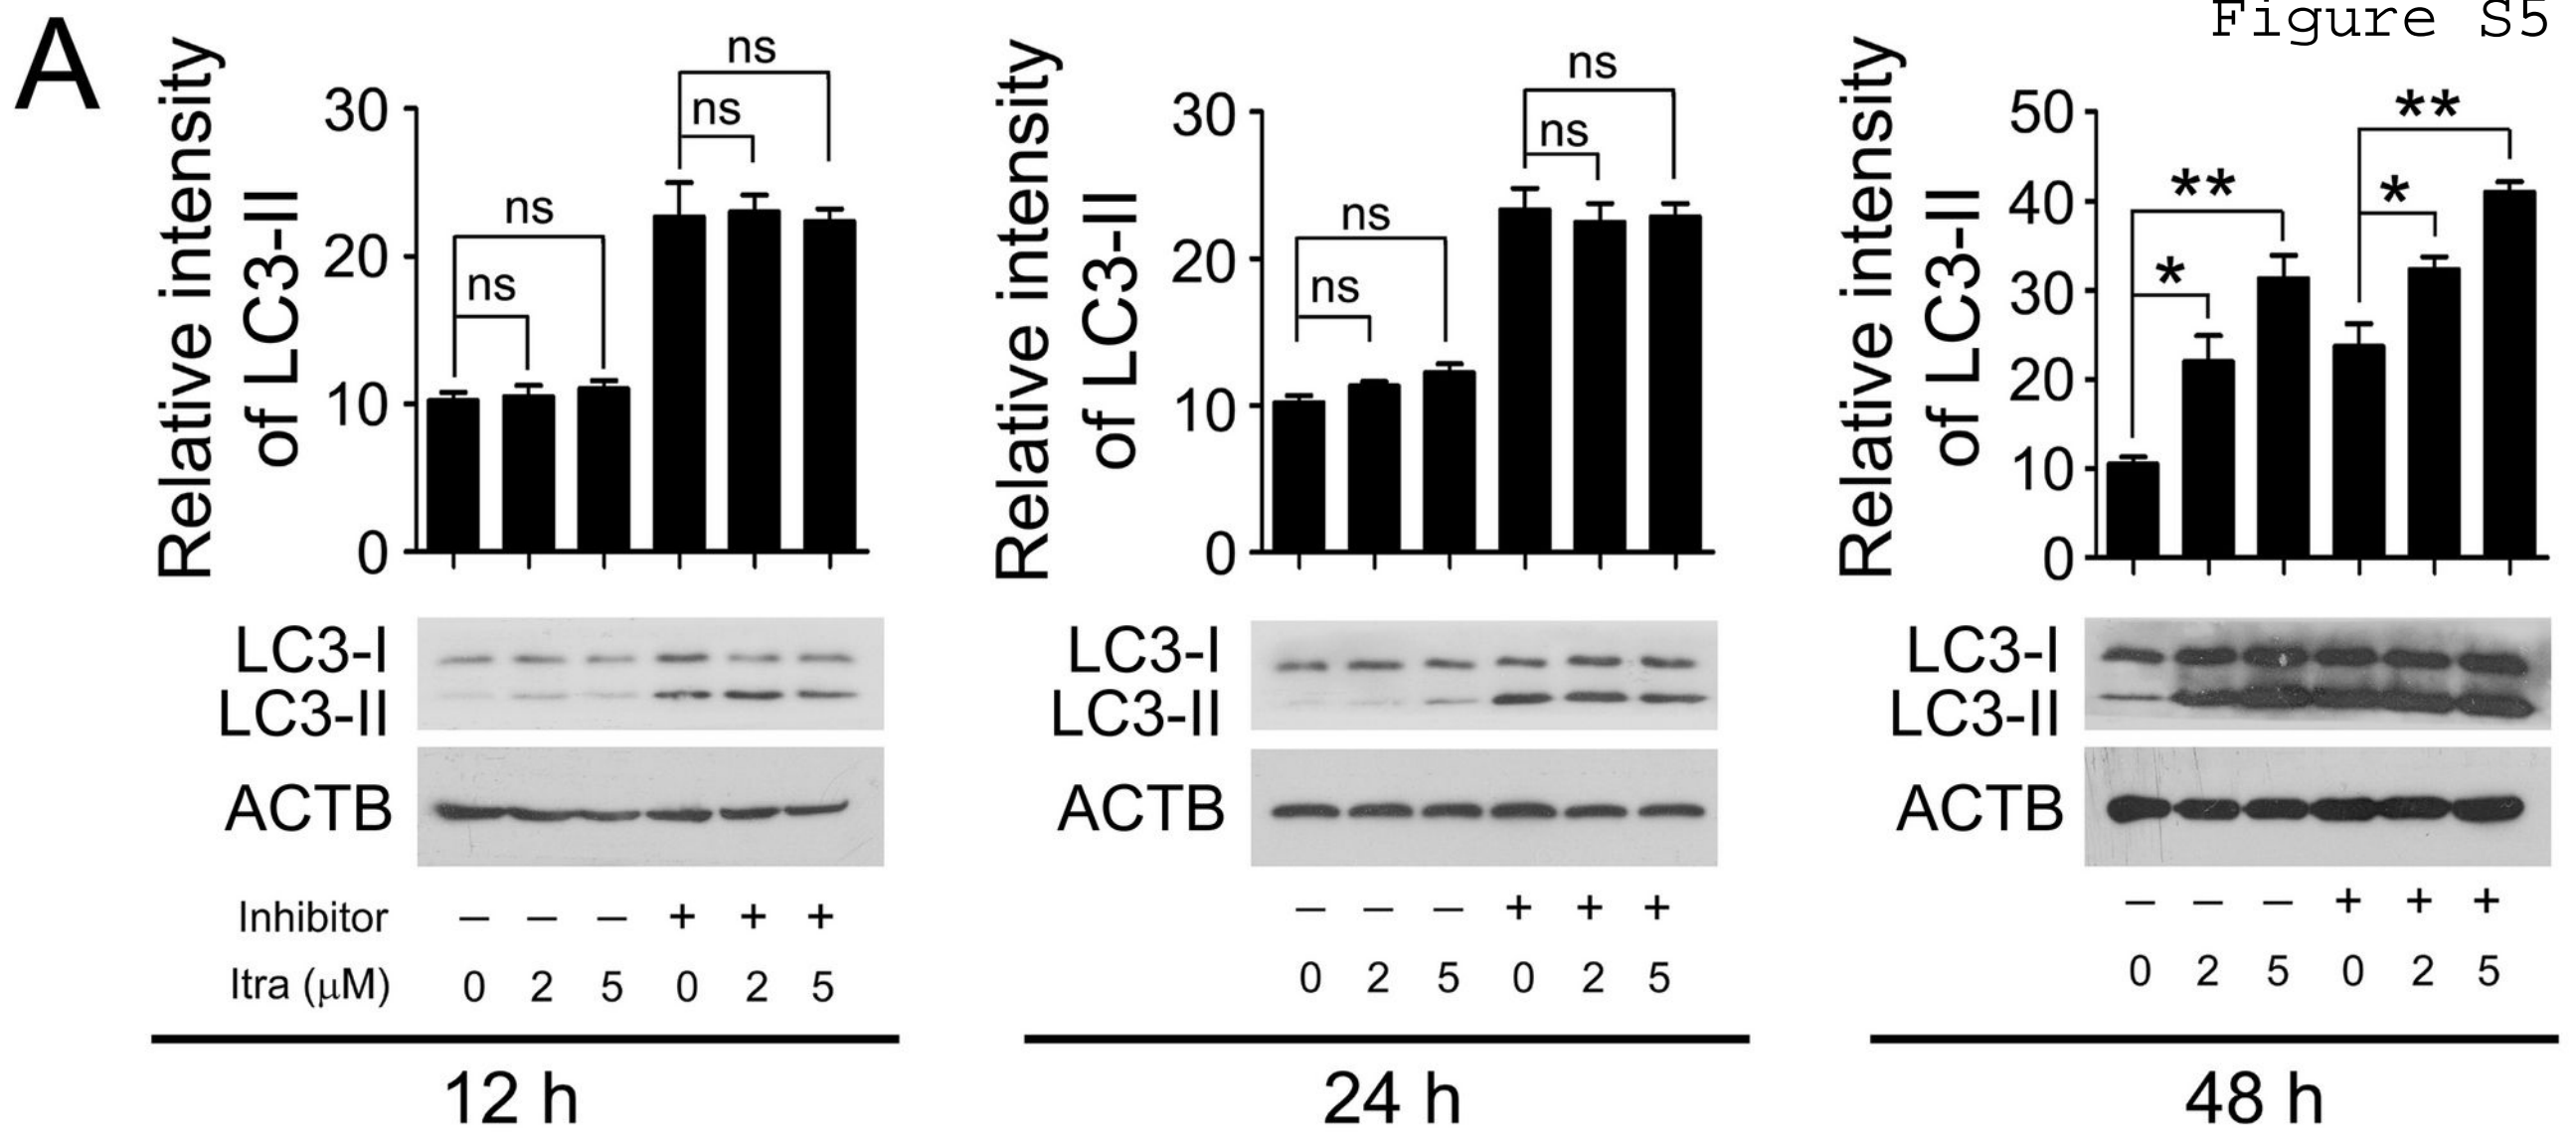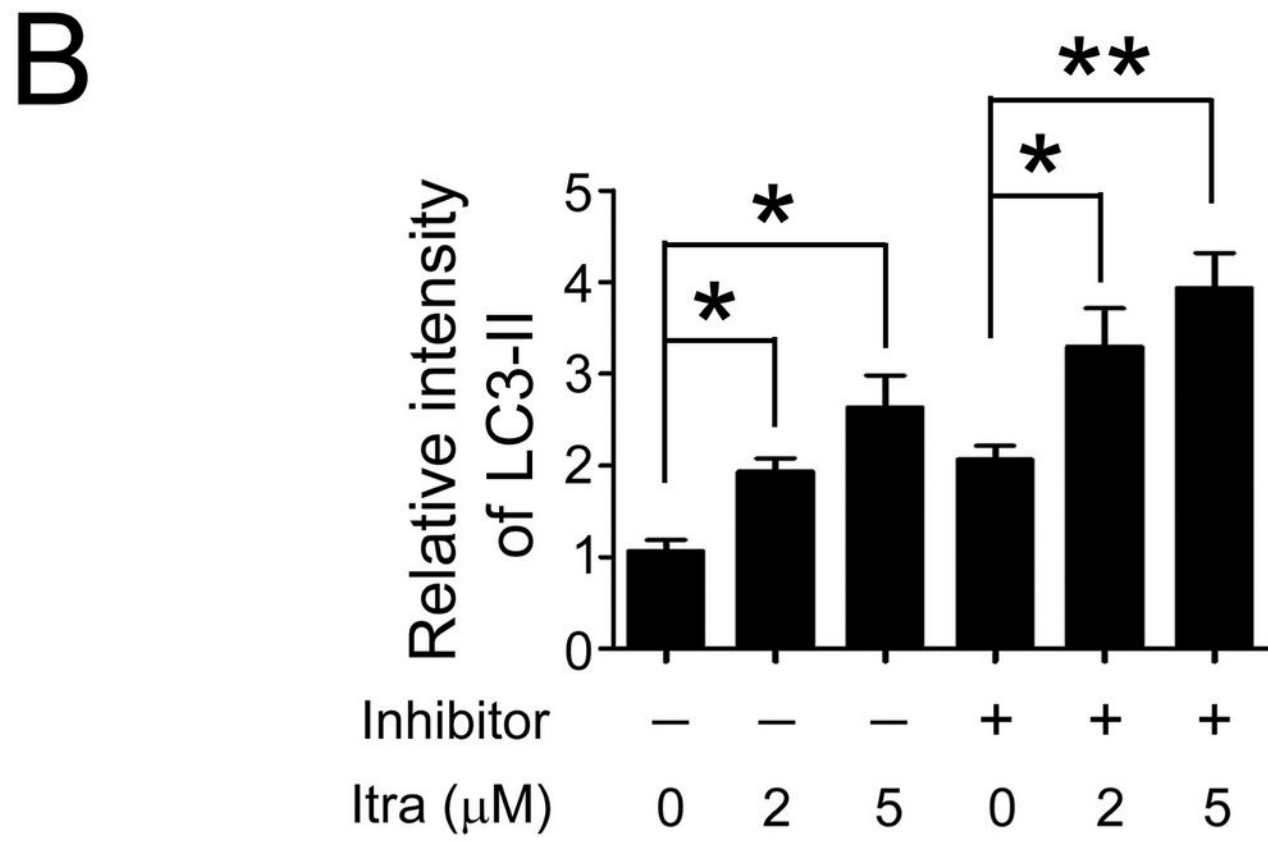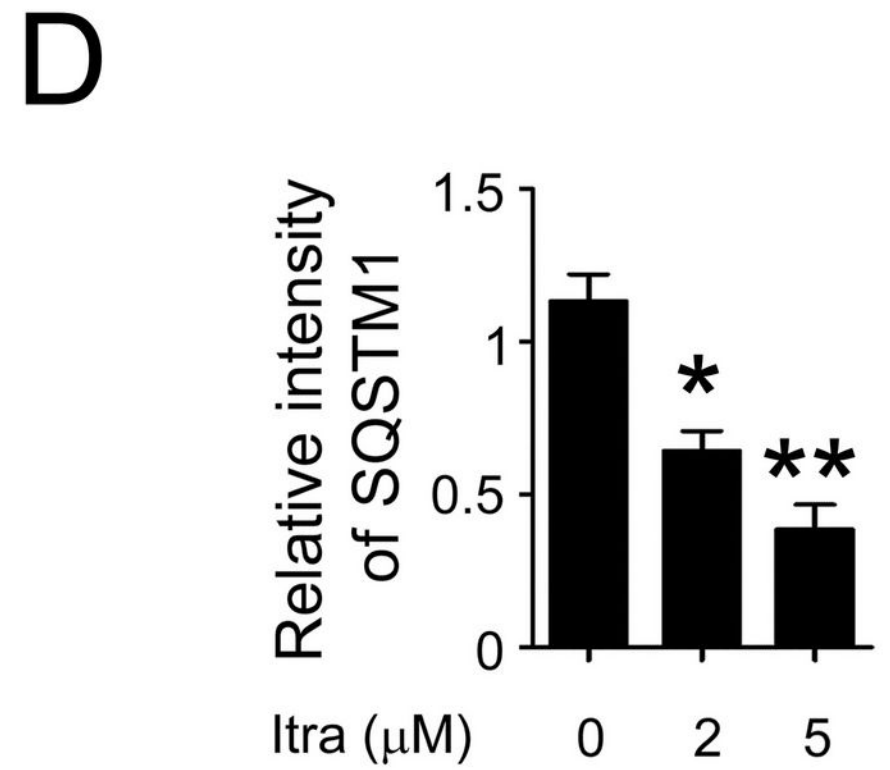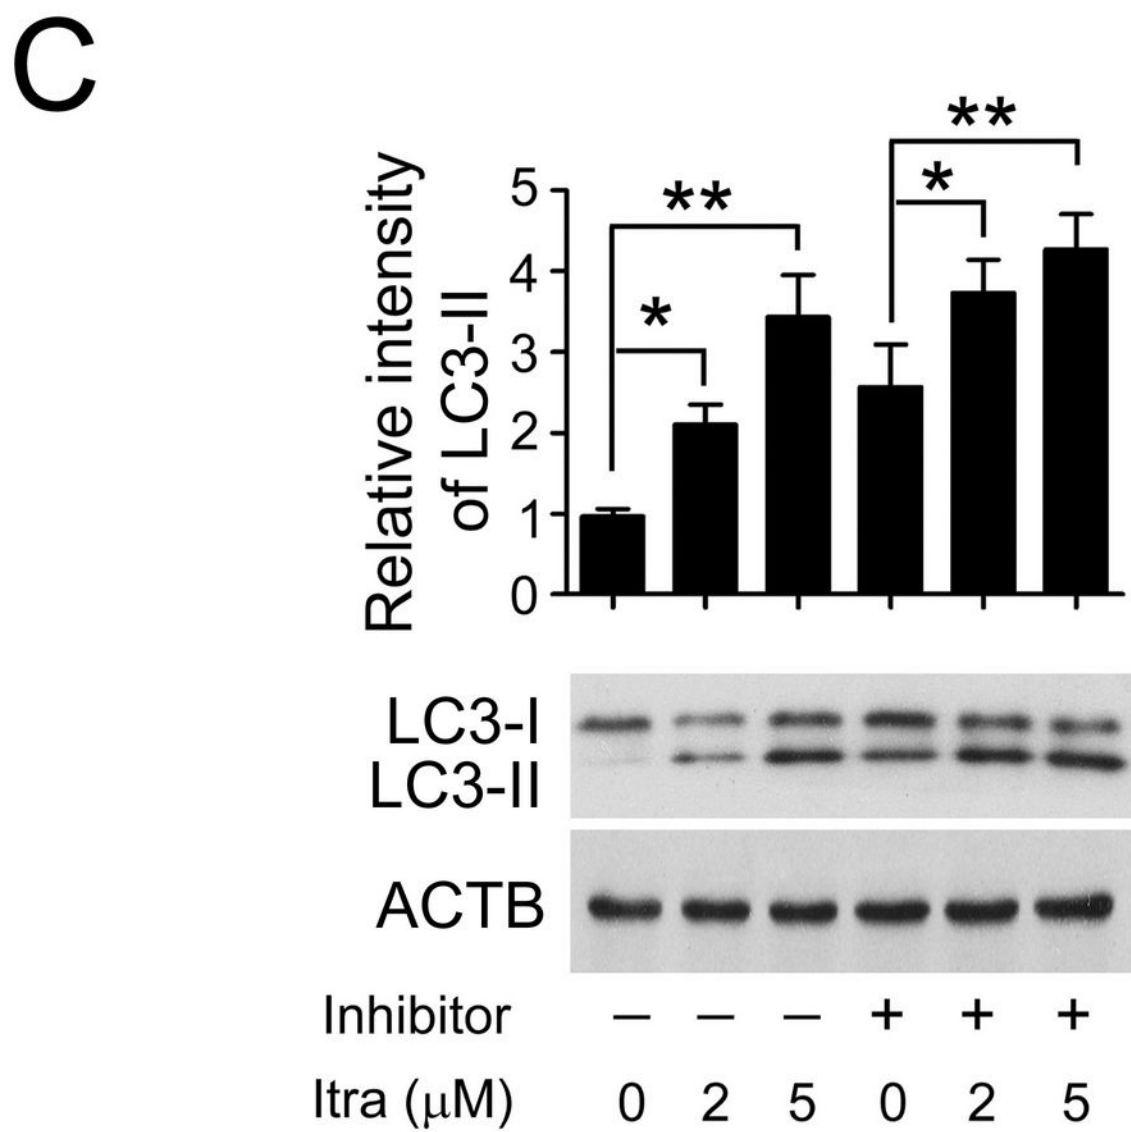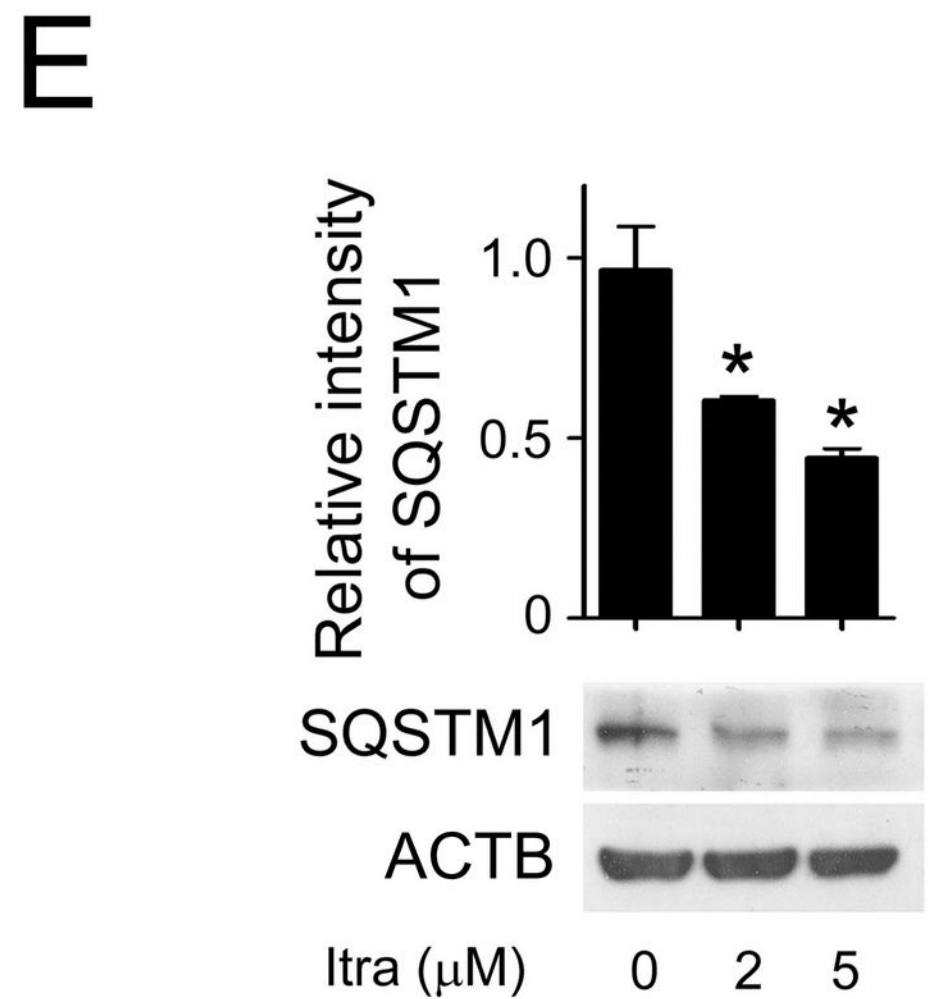

**A**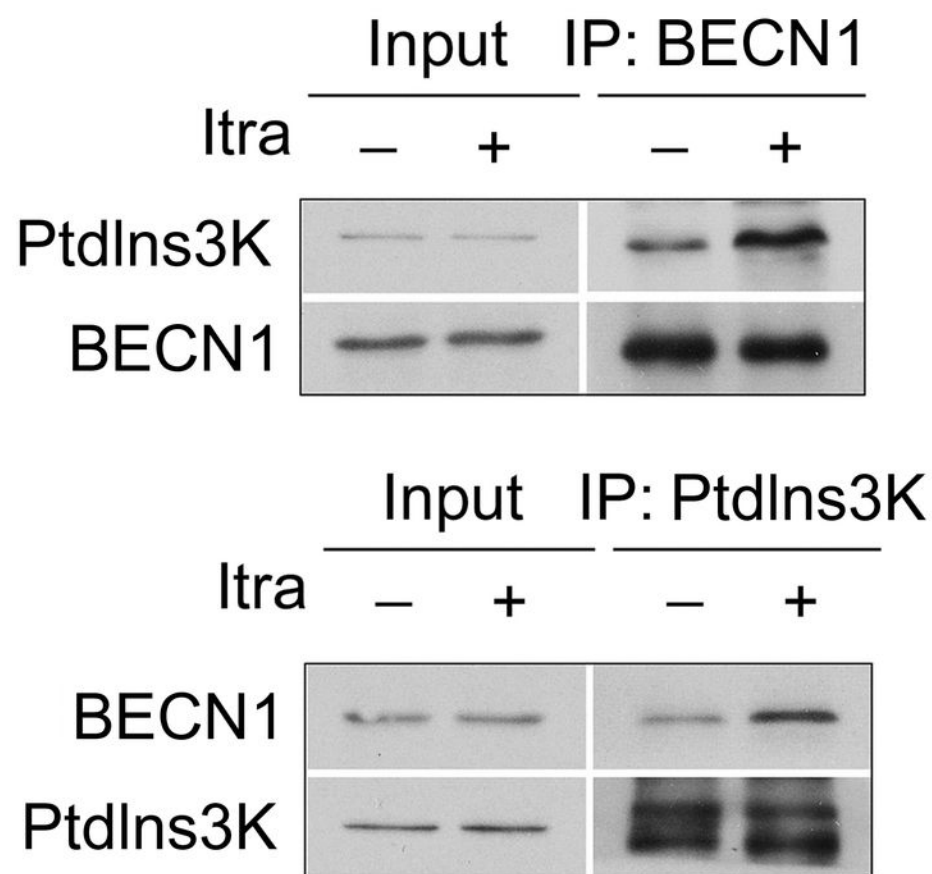**B**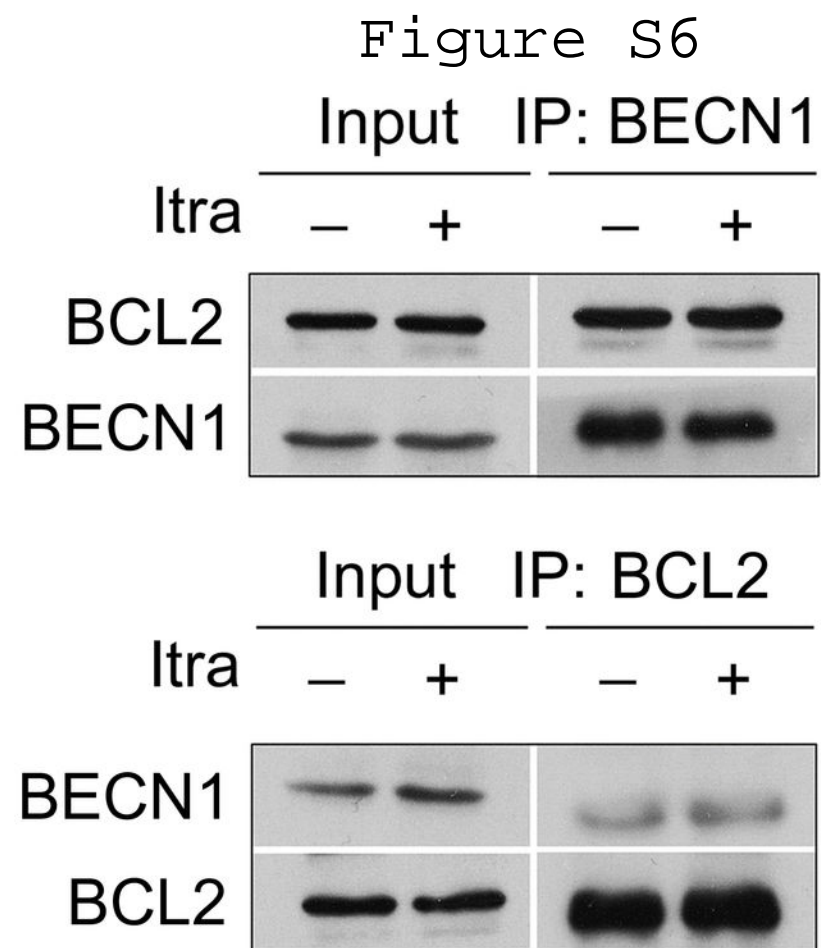**C**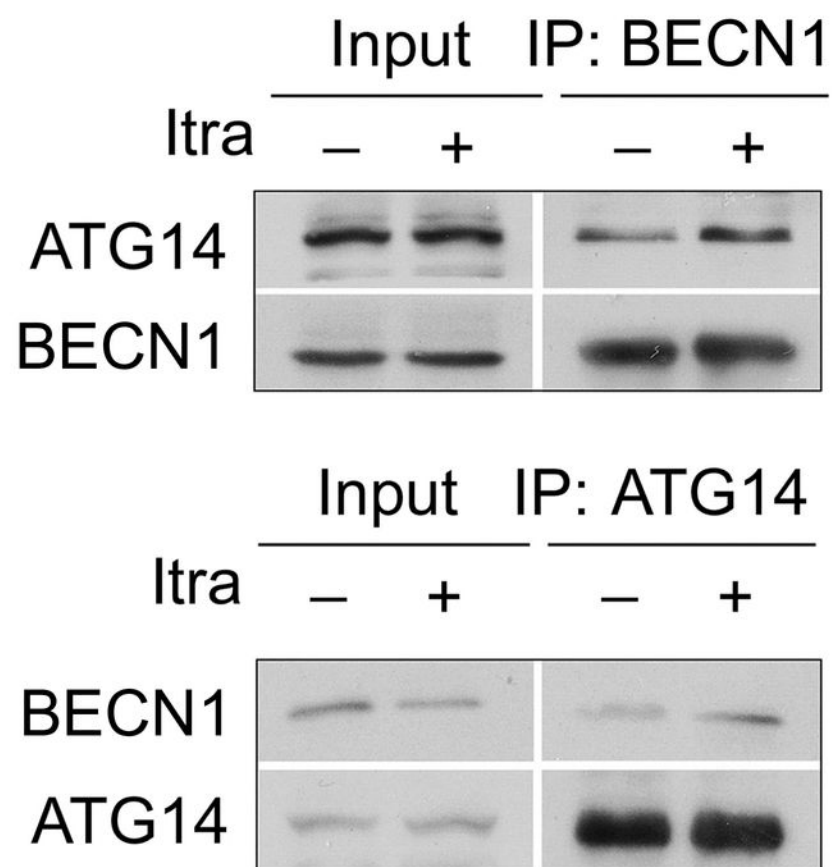**D**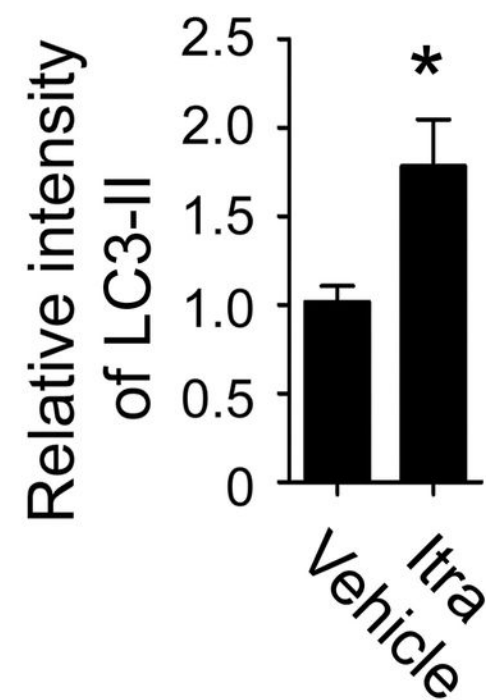

A

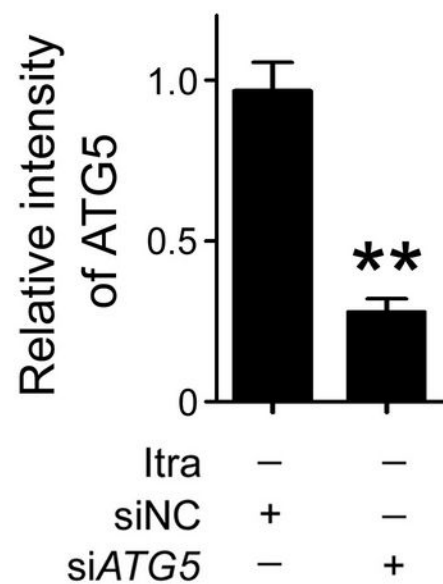

B

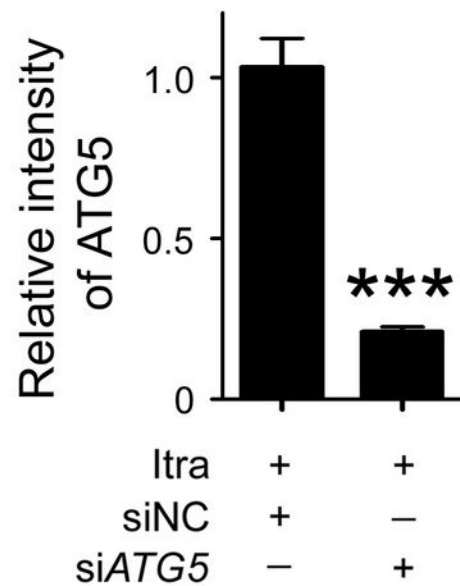

C

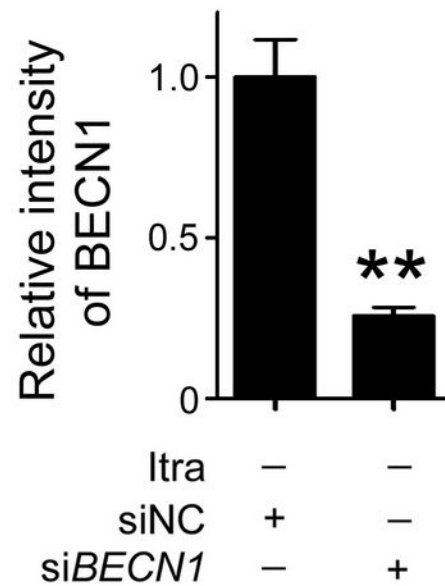

D

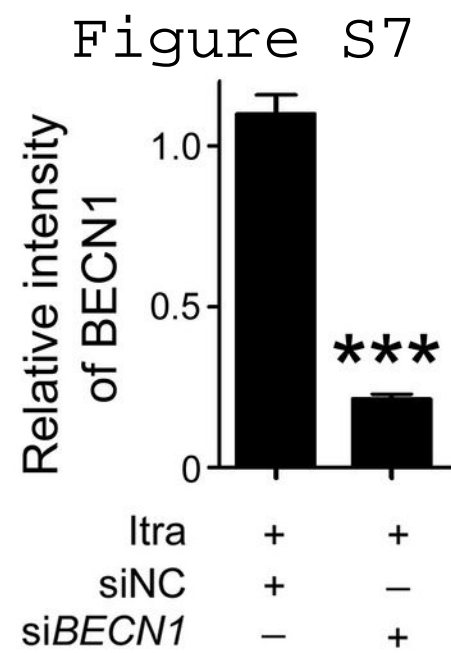

Figure S7

E

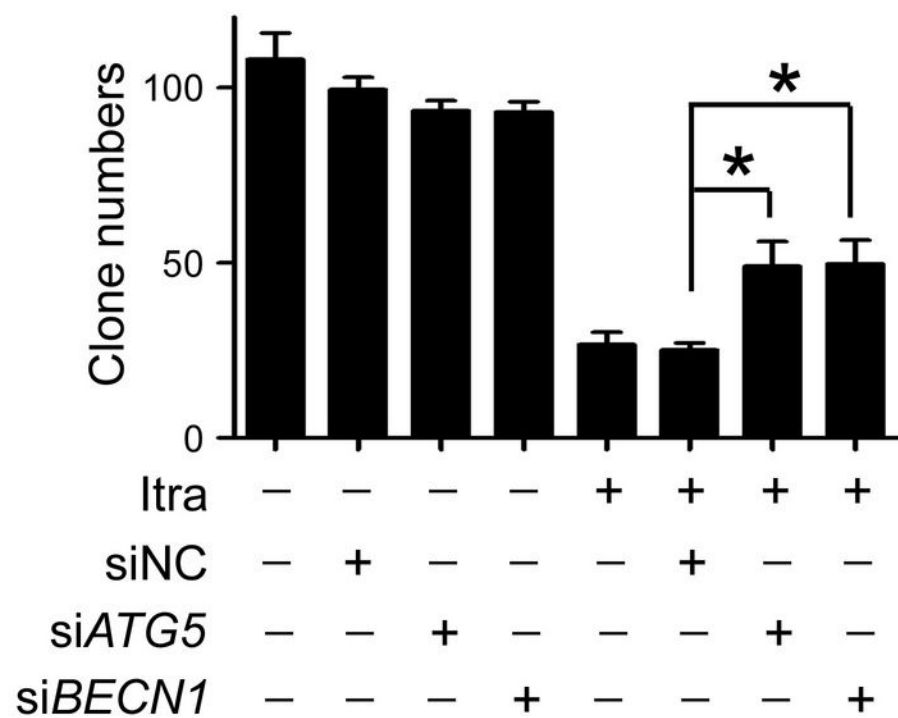

F

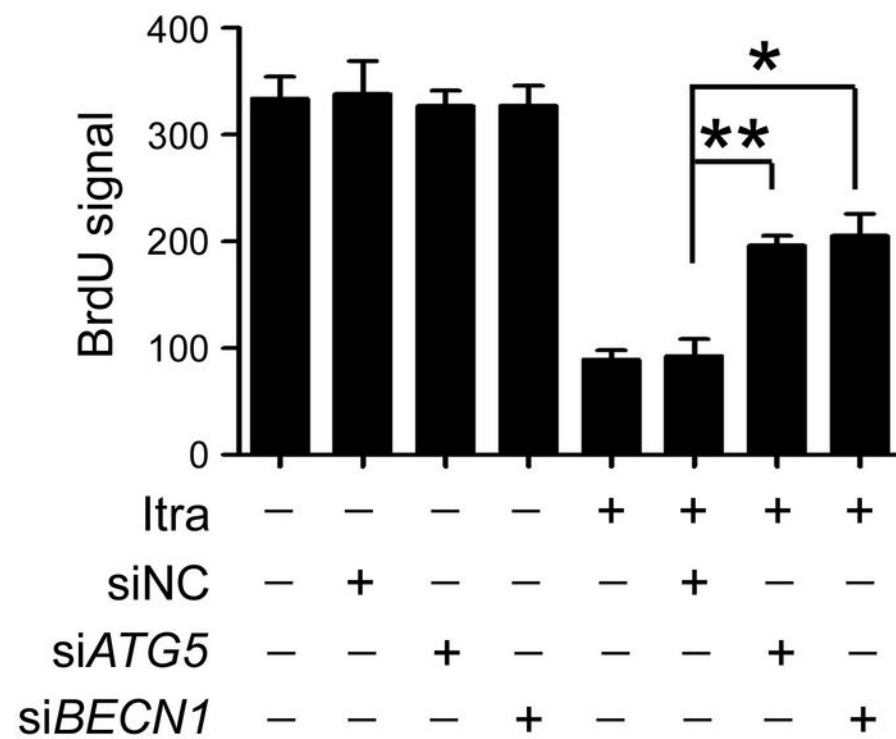

A

Figure S8

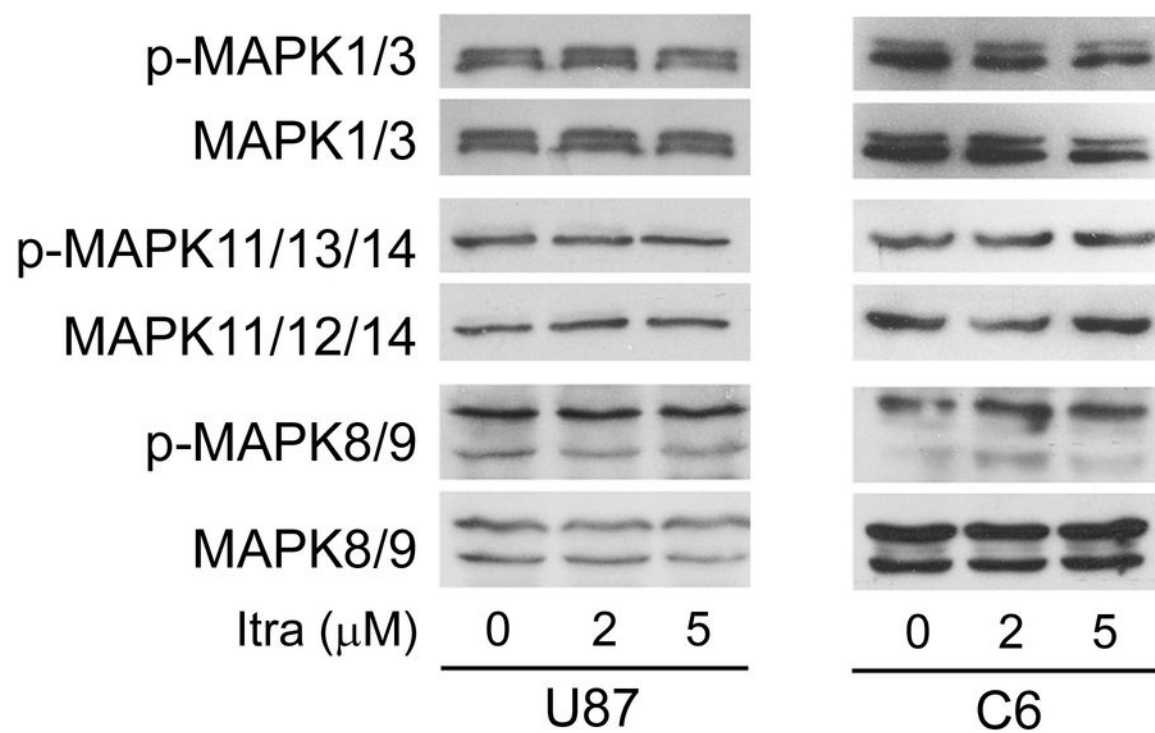

B

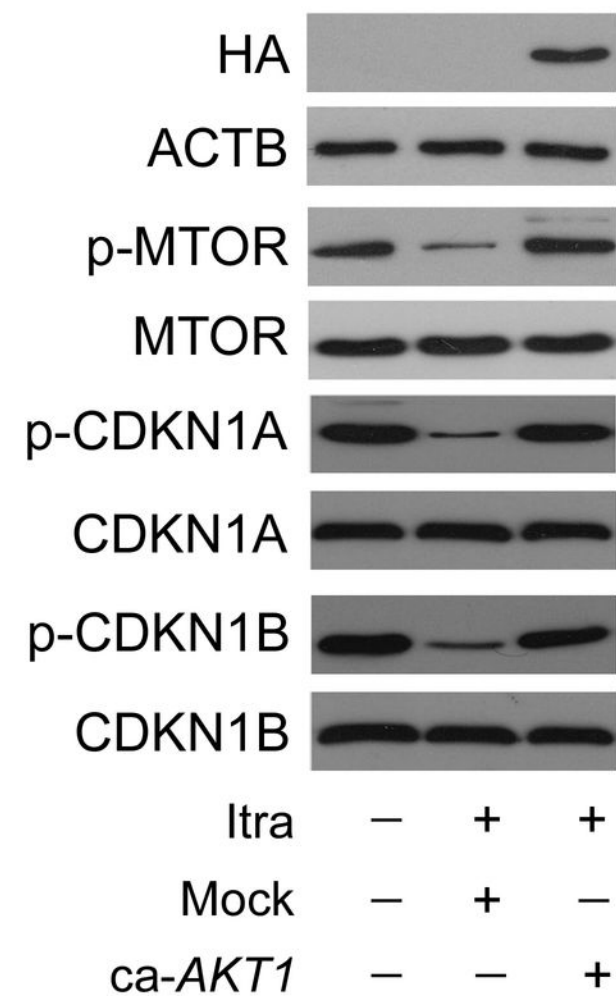

C

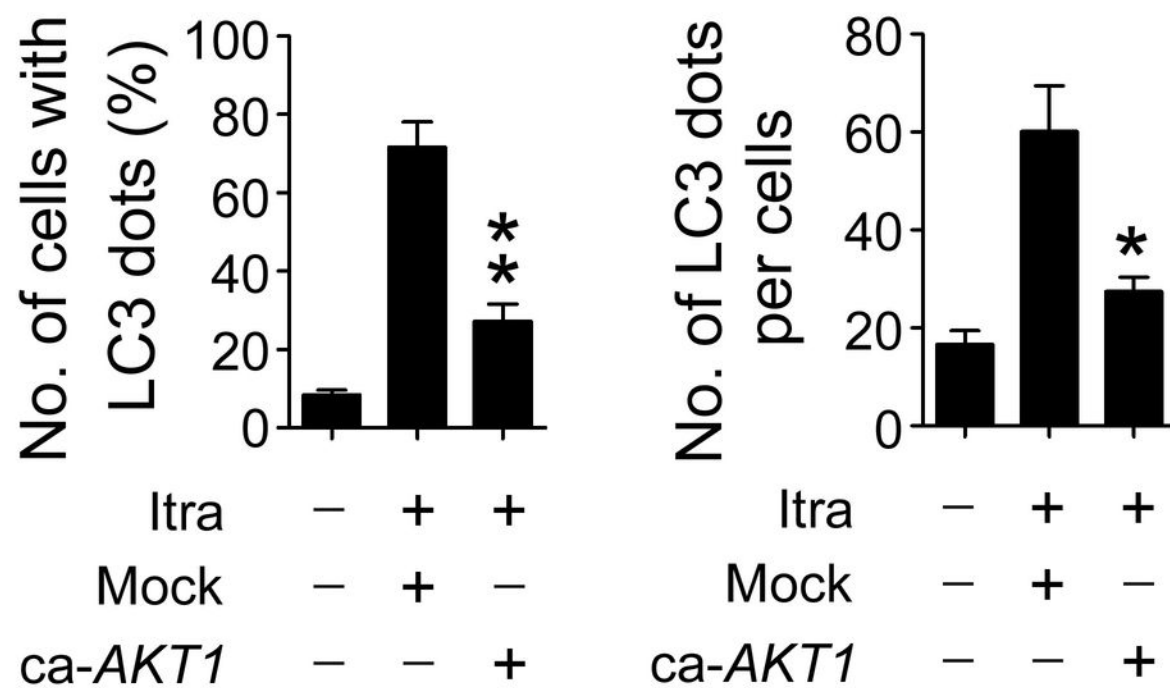

D

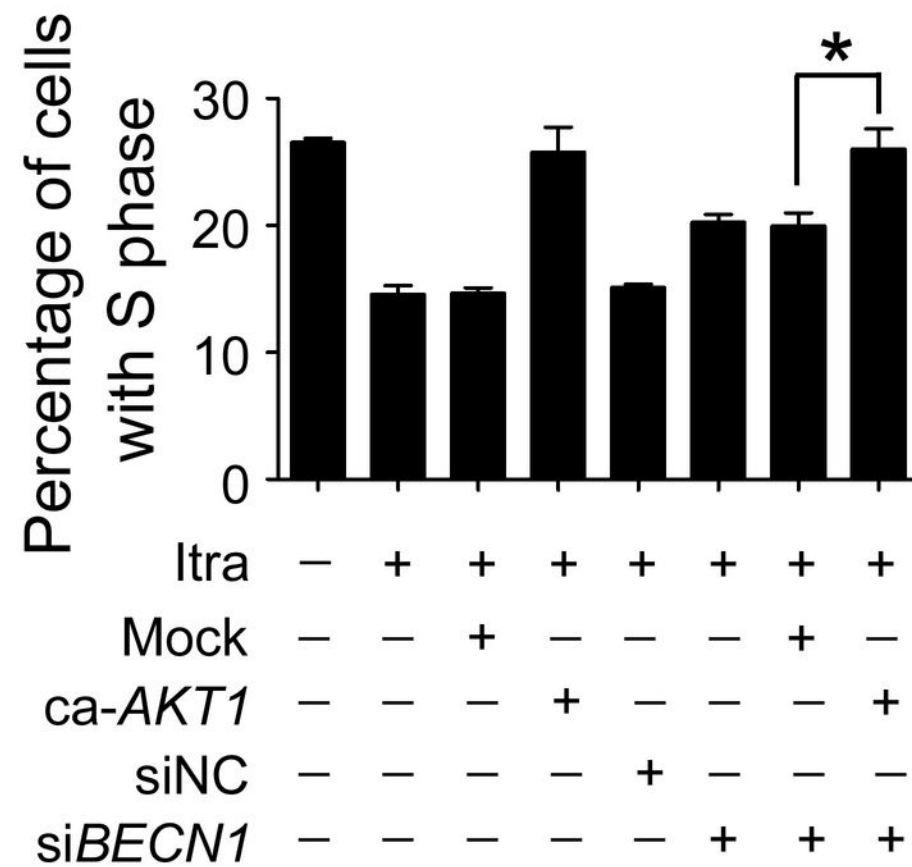



**A**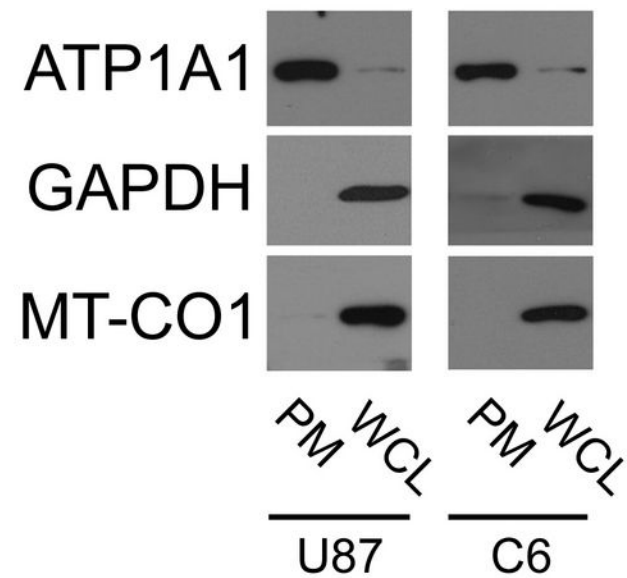**B**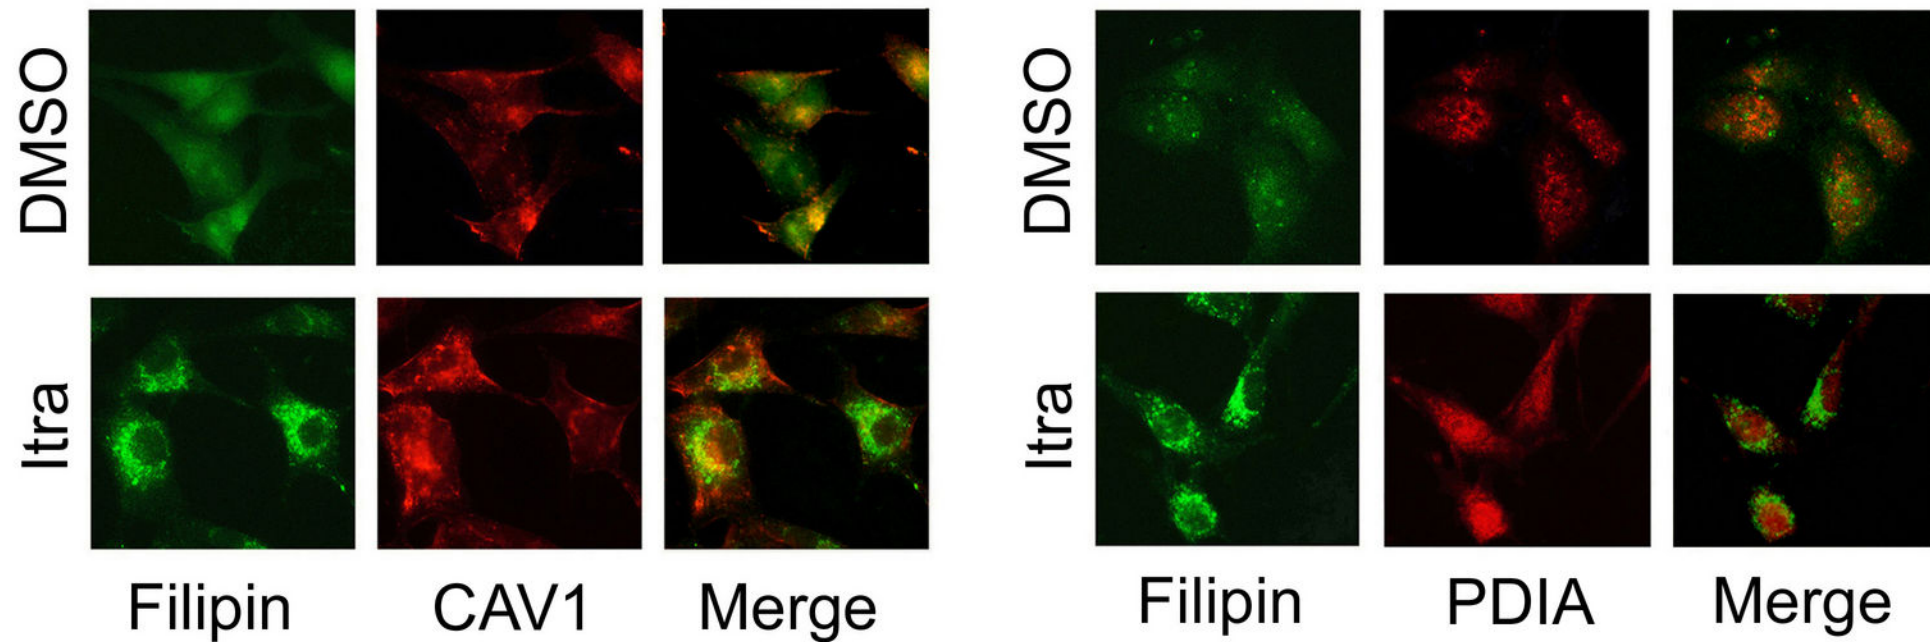

Figure S9



**A**

Figure S10

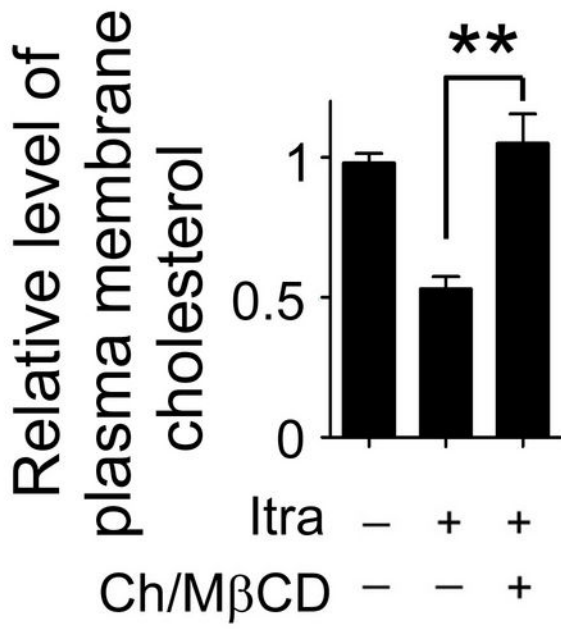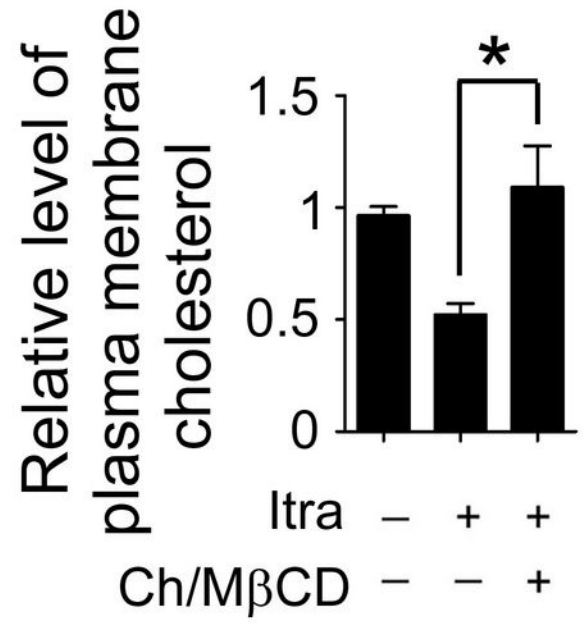

**B**

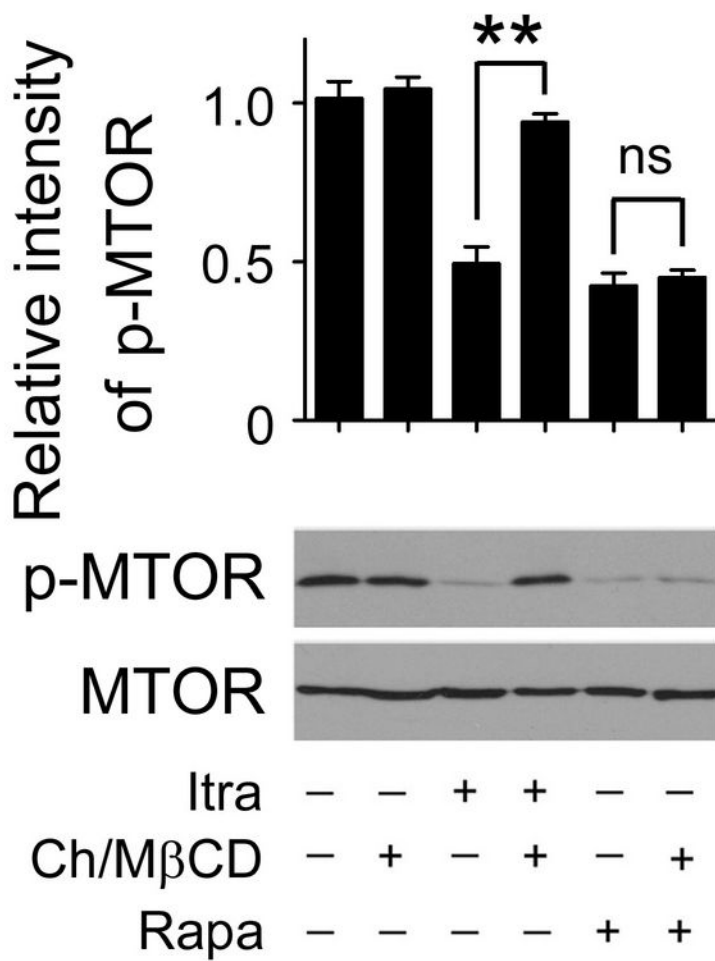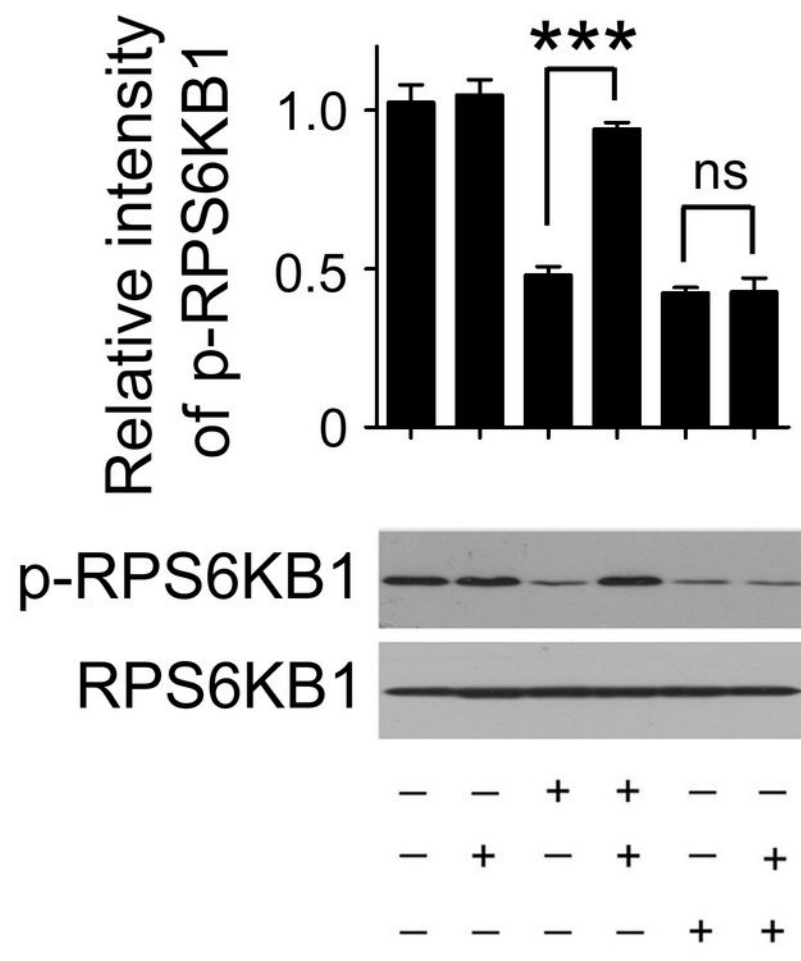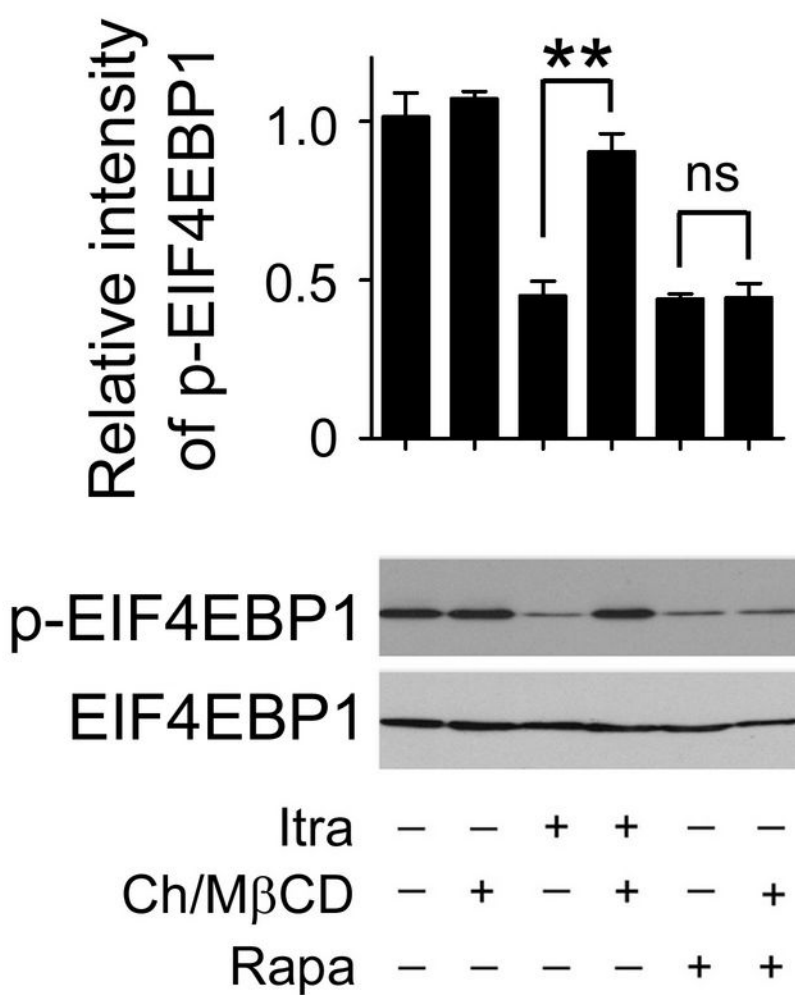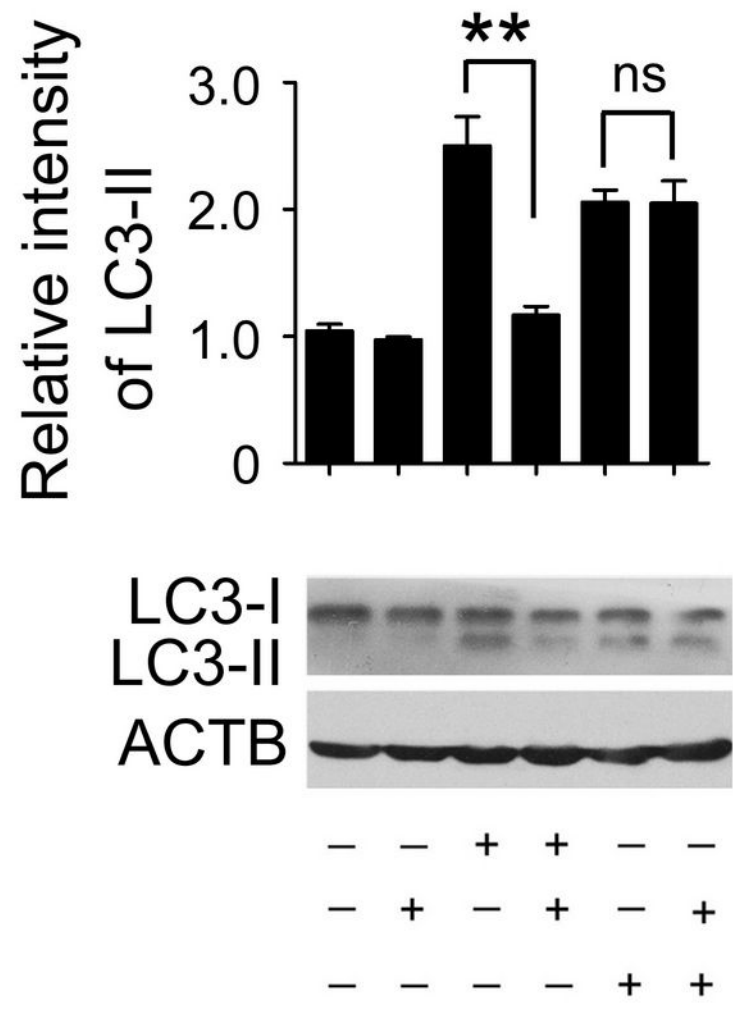

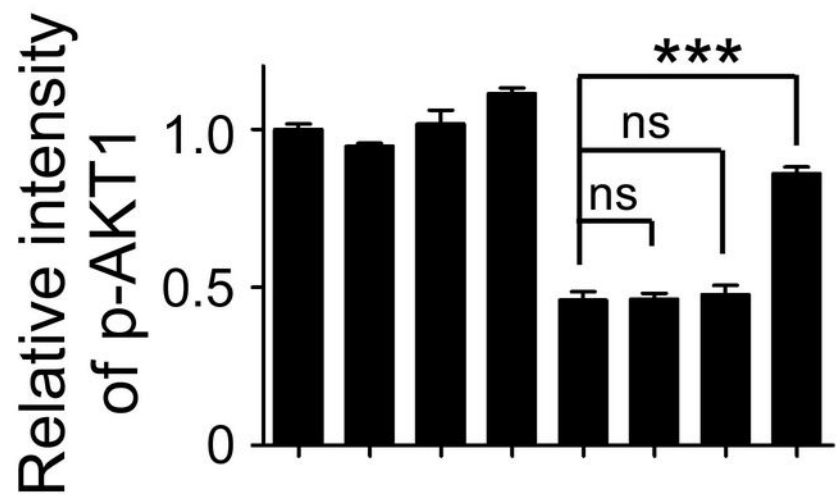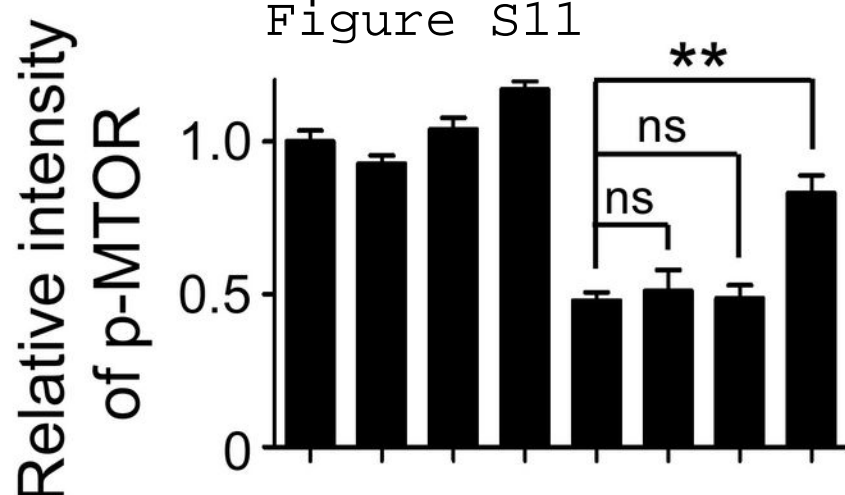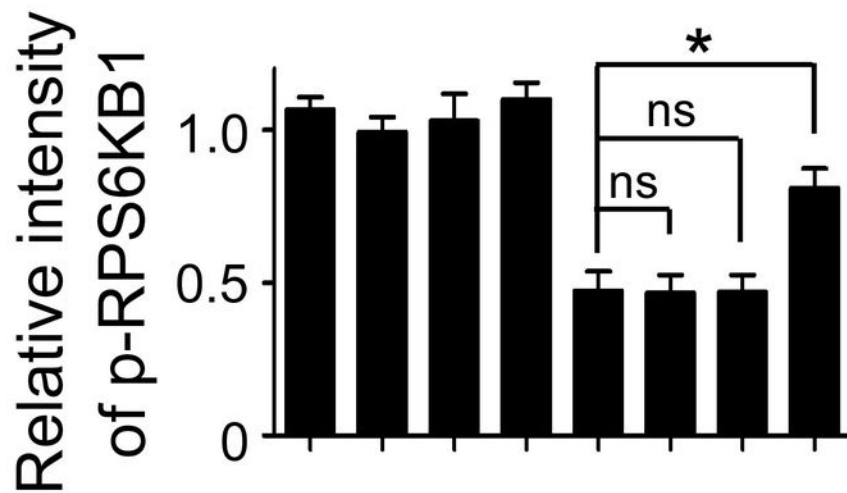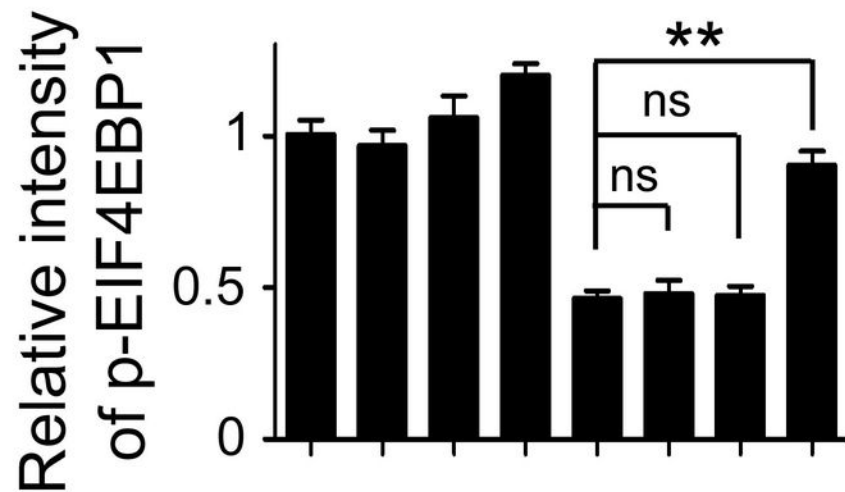

|             |   |   |   |   |   |   |   |   |
|-------------|---|---|---|---|---|---|---|---|
| Itra        | - | - | - | - | + | + | + | + |
| MβCD        | - | + | - | - | - | + | - | - |
| Cholesterol | - | - | + | - | - | - | + | - |
| Ch/MβCD     | - | - | - | + | - | - | - | + |

Figure S11

A

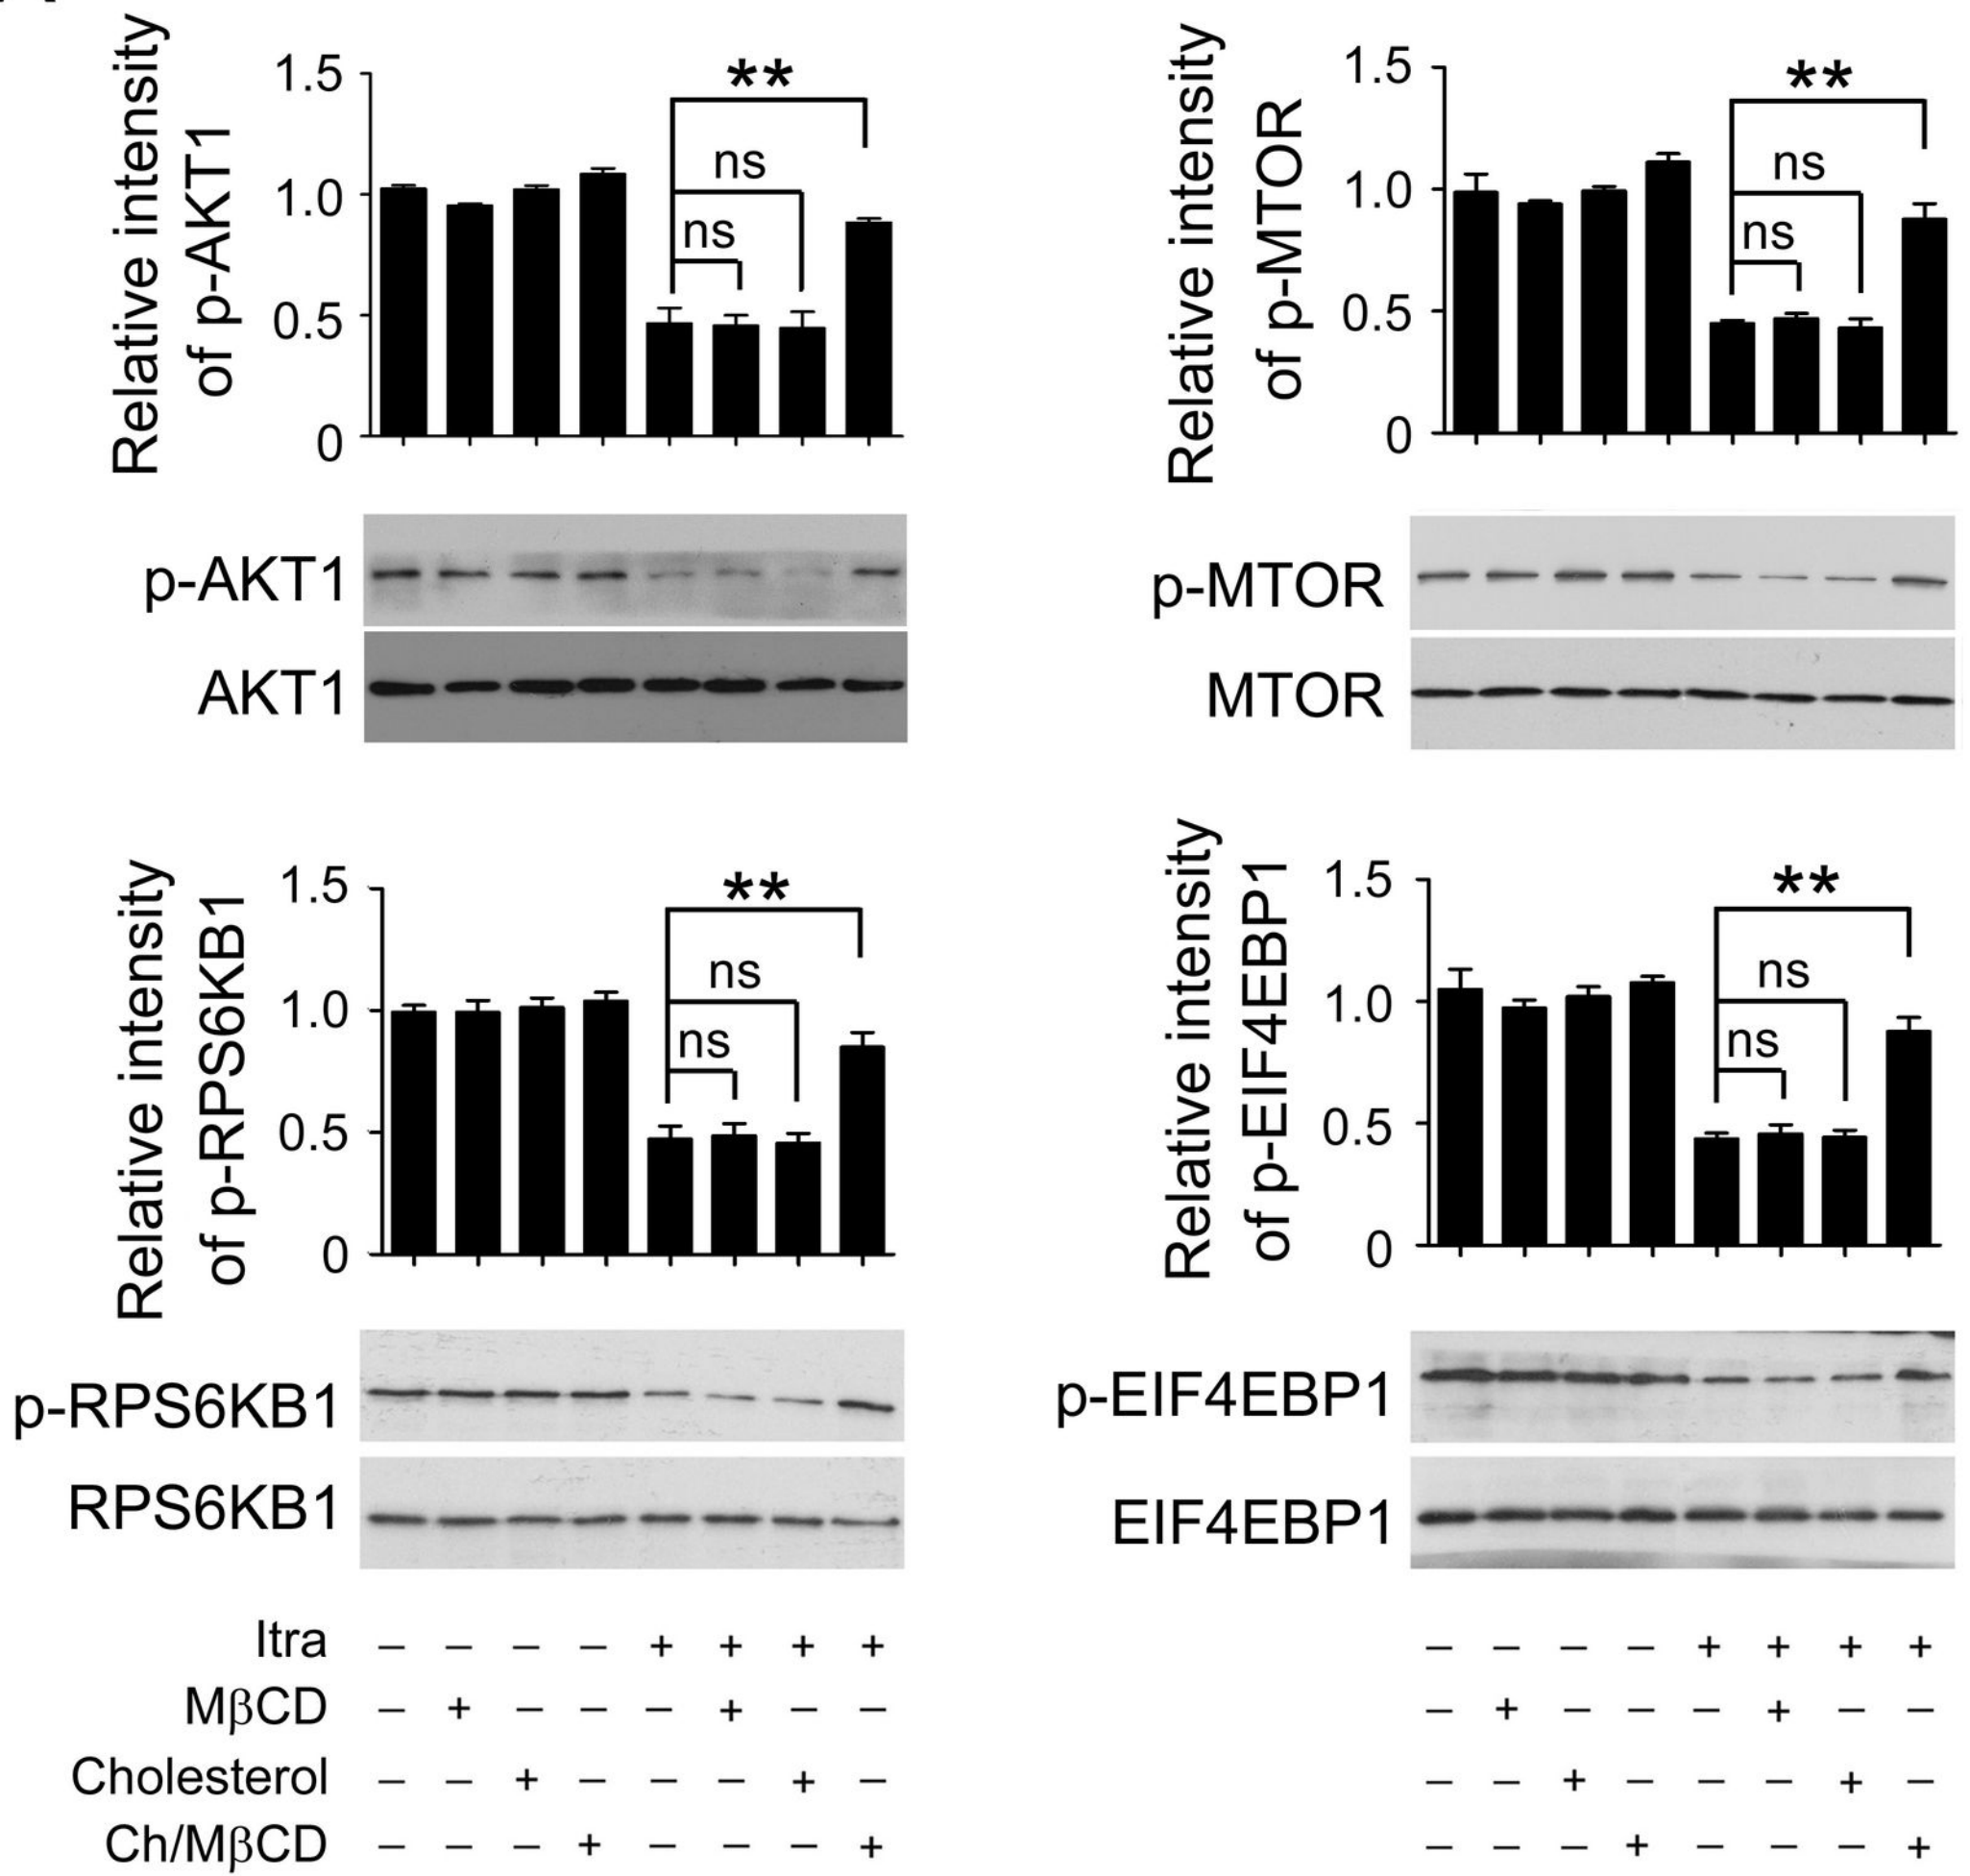

B

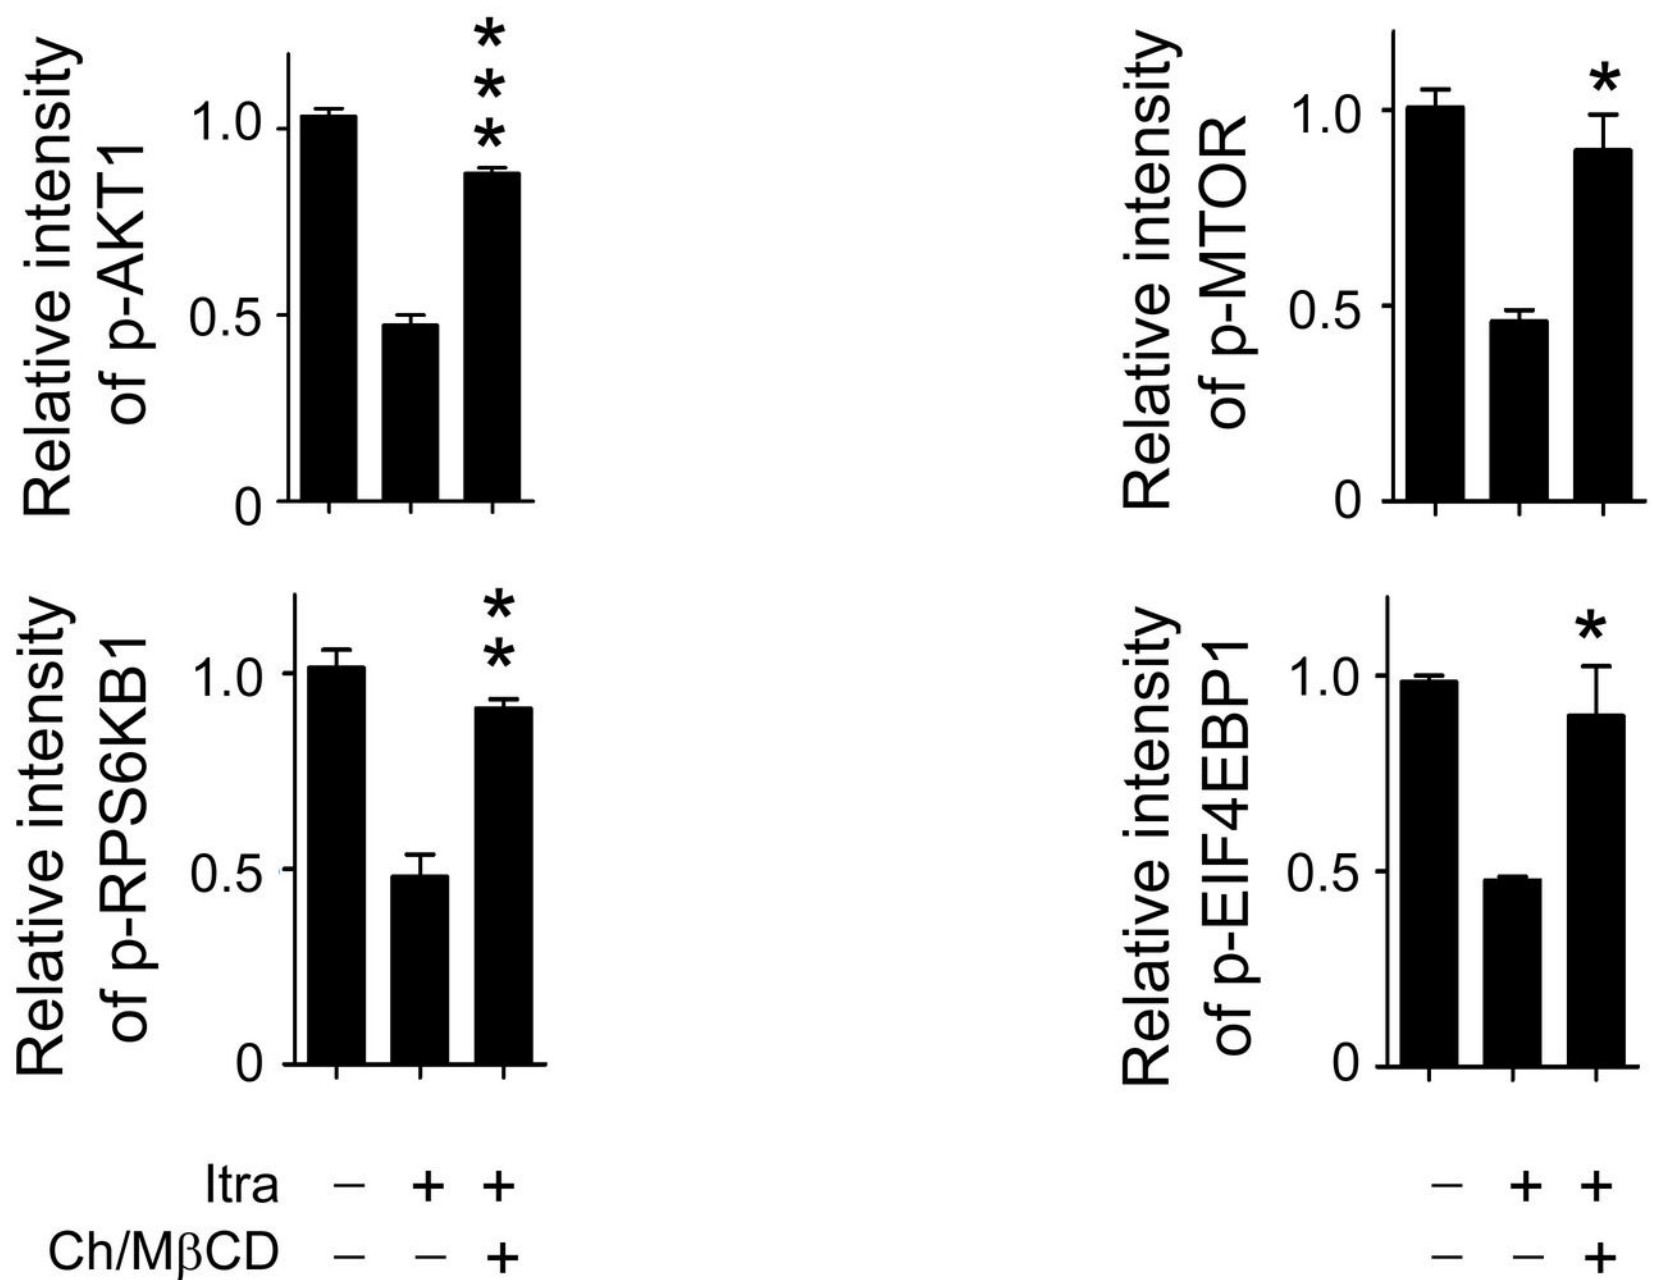

Figure S13

A

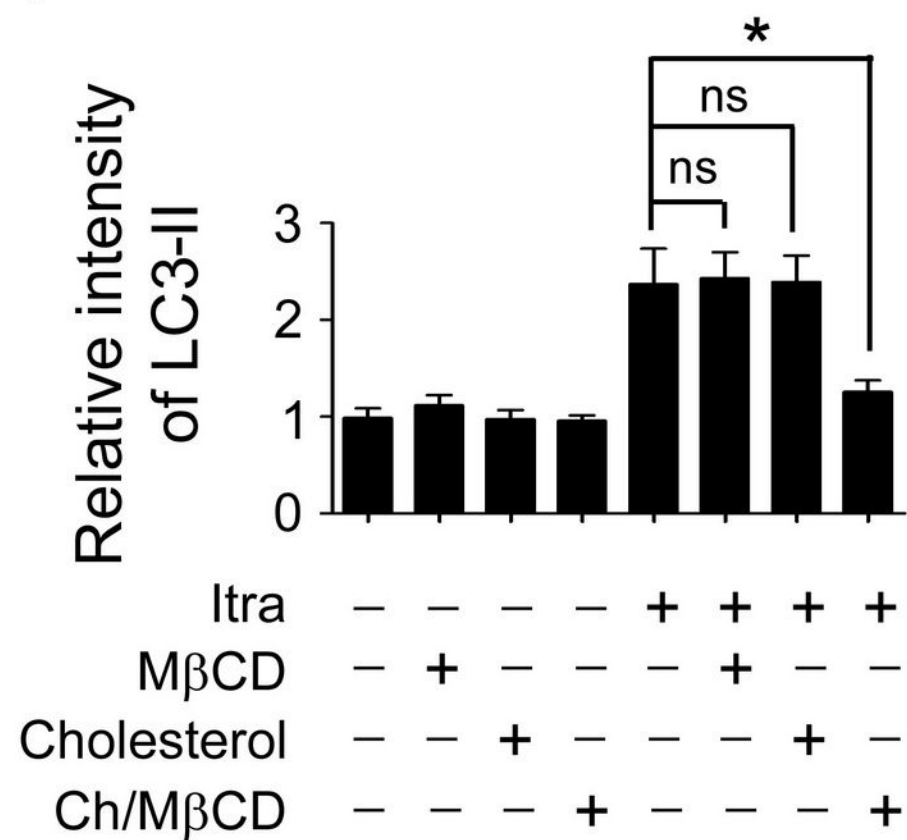

B

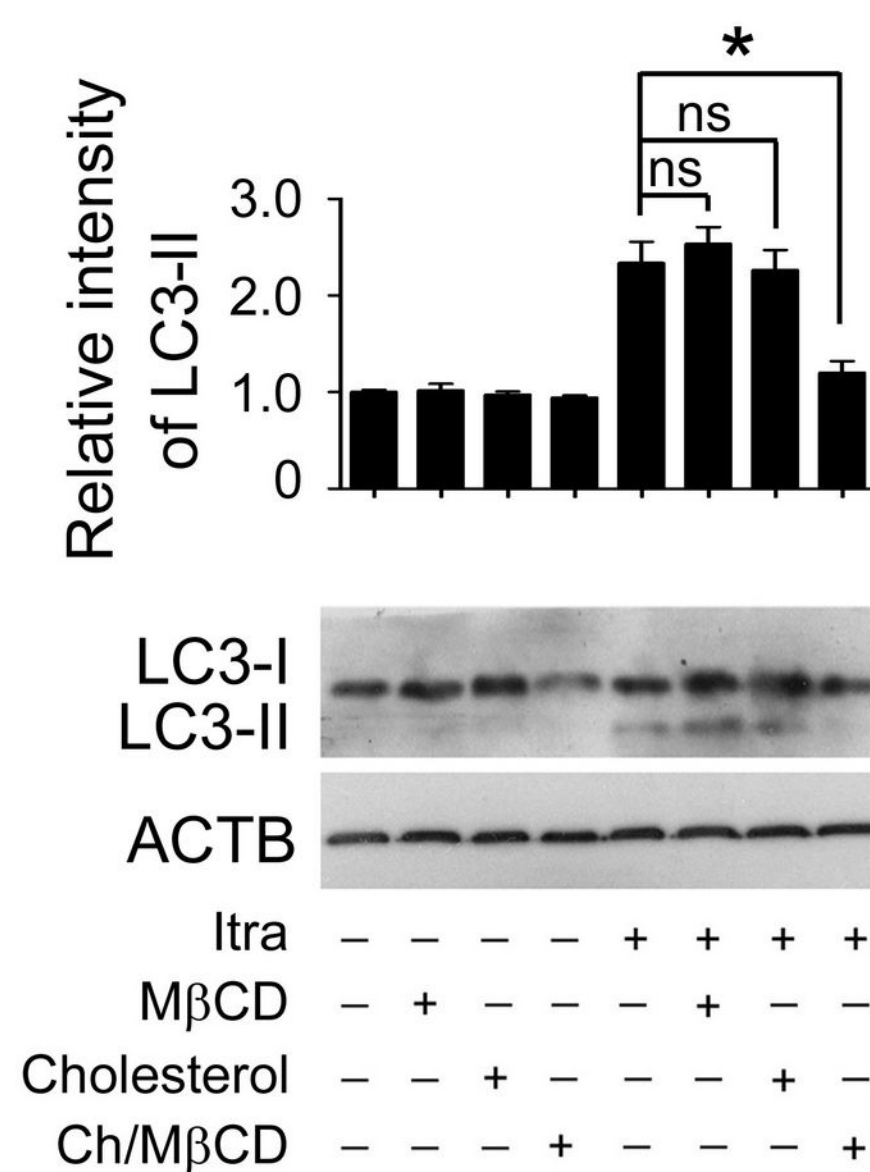

C

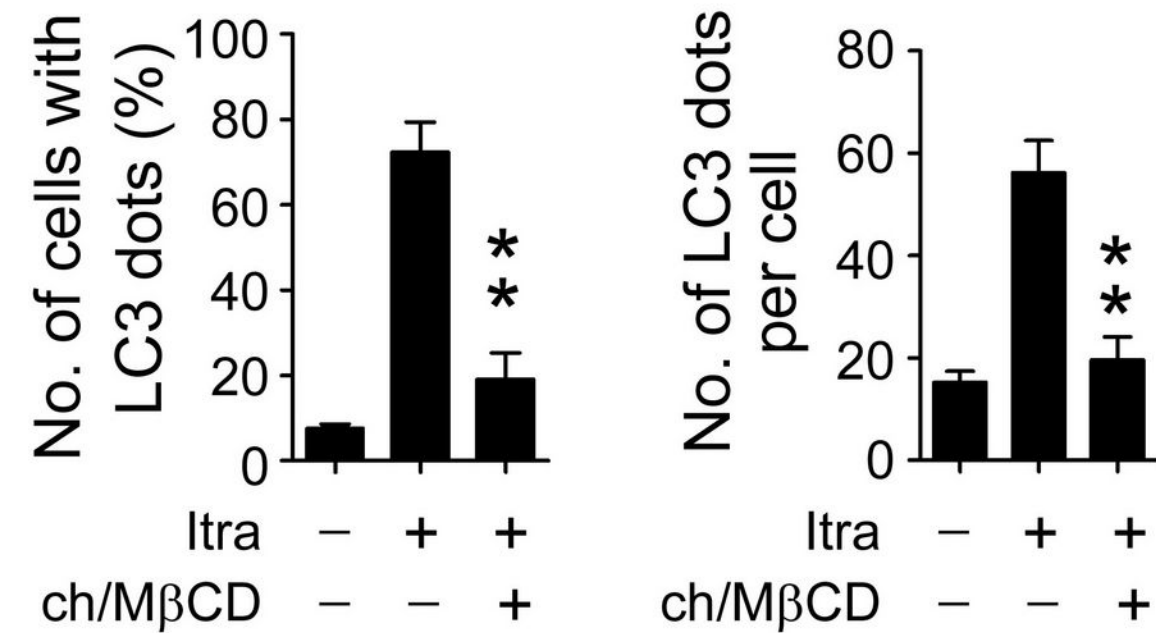

D

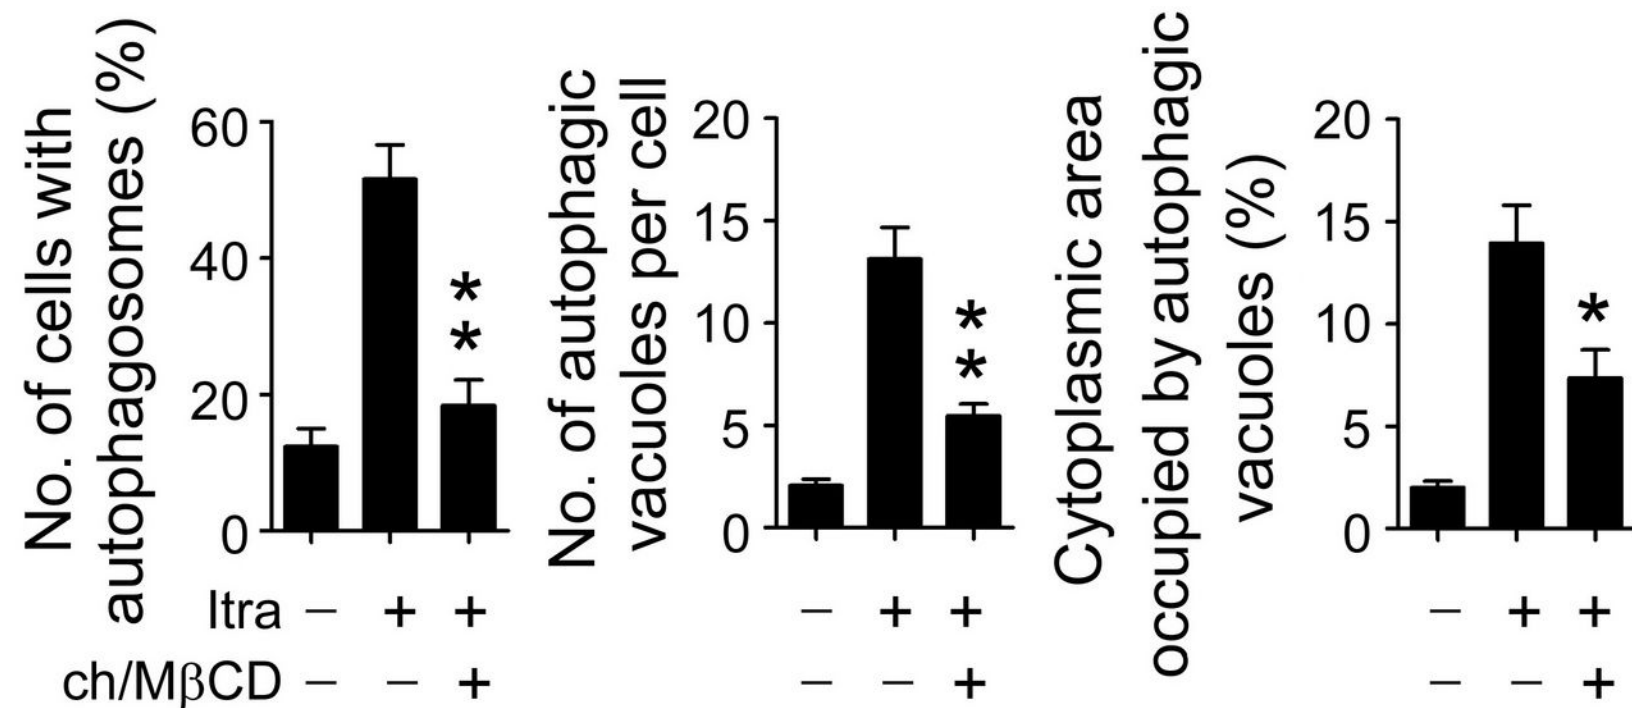

E

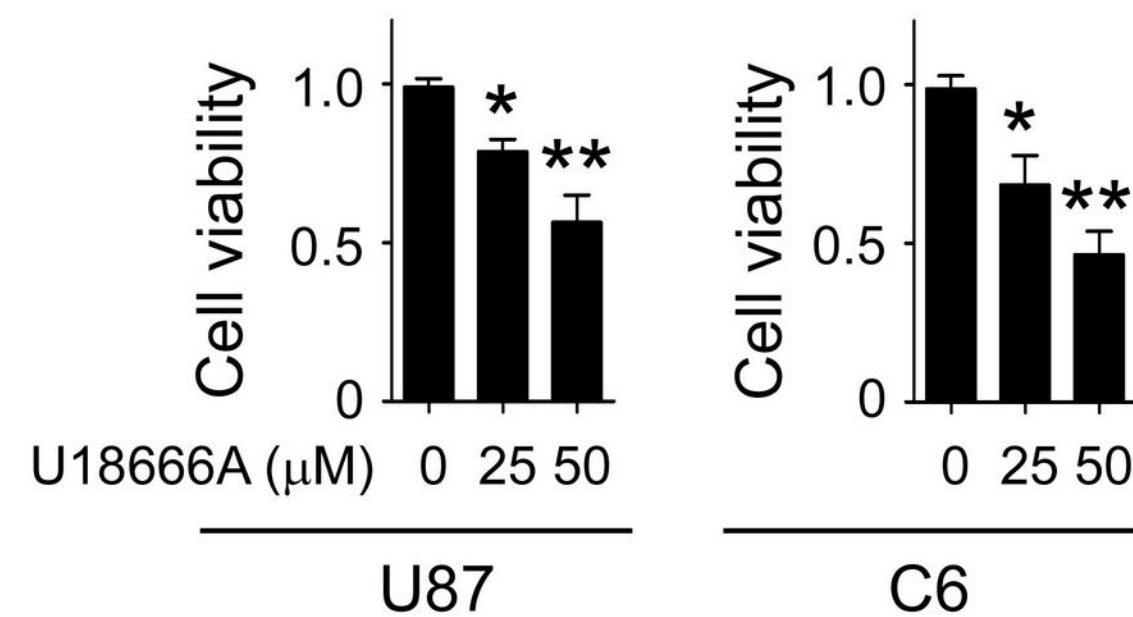



Figure S14

A

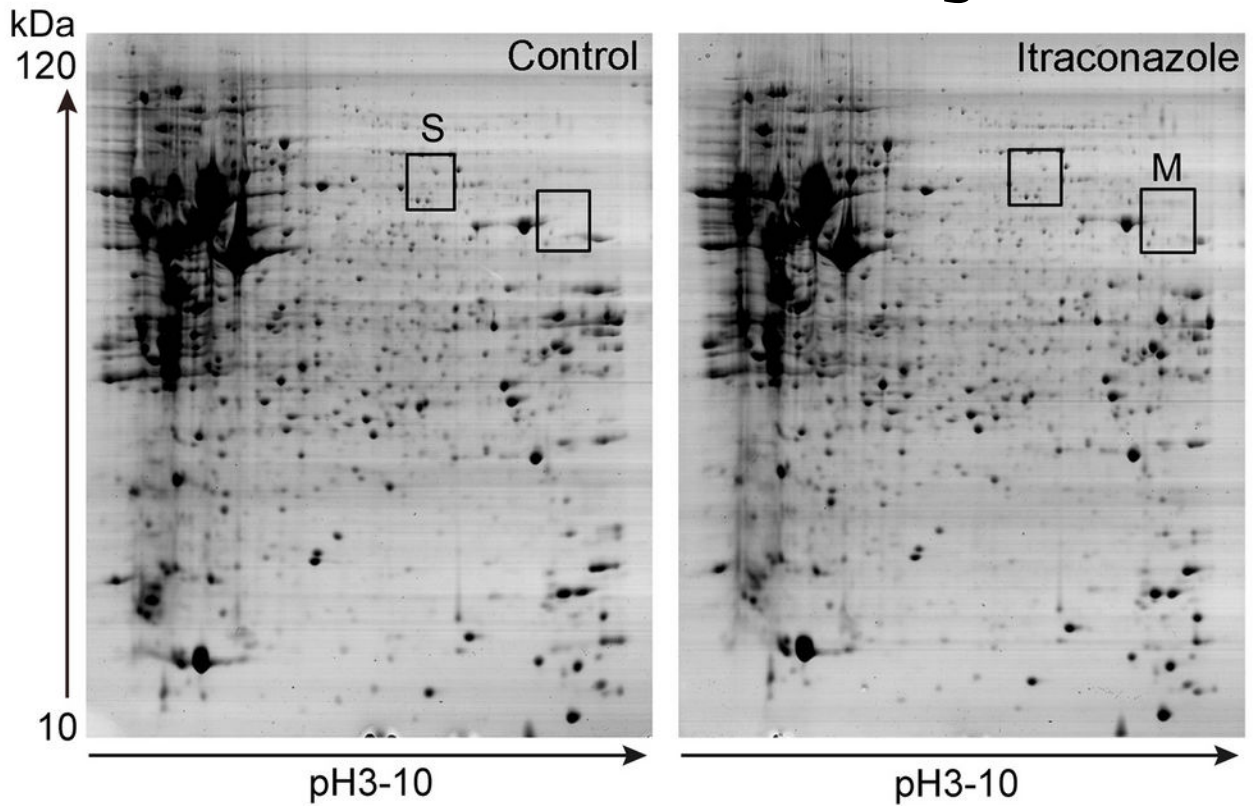

B

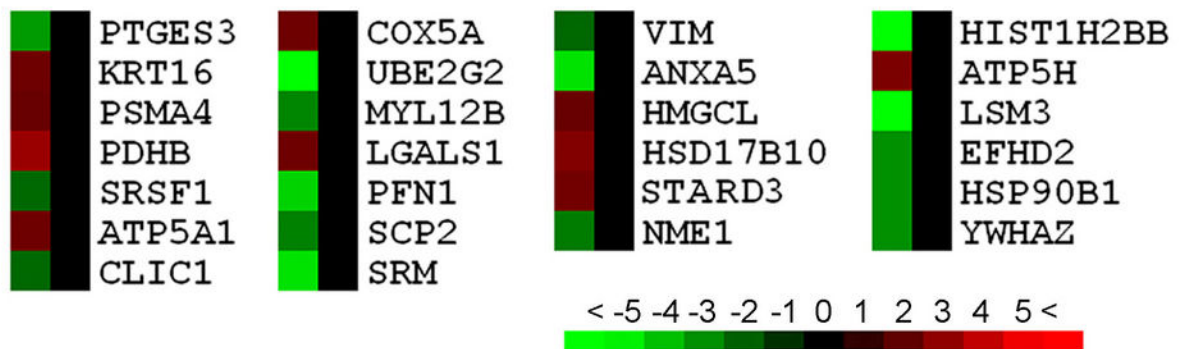

C

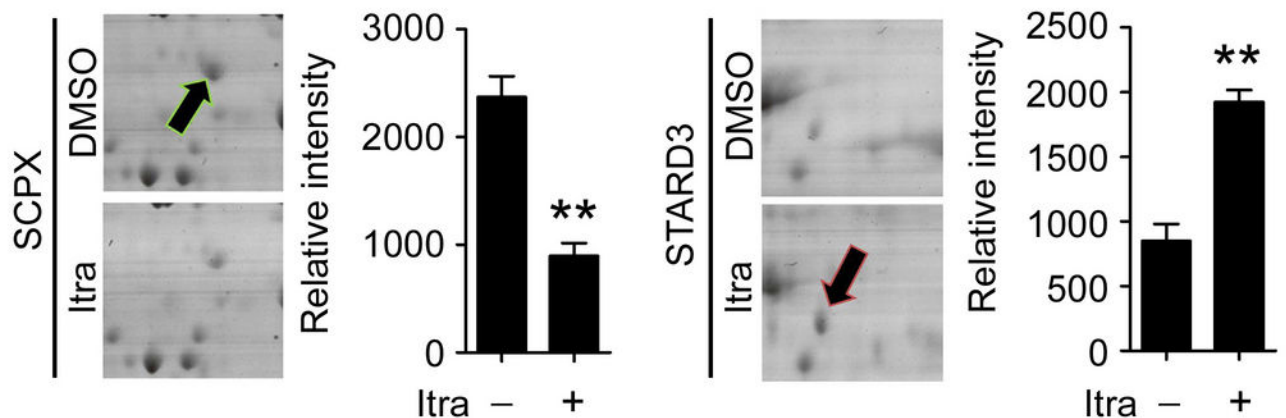

A

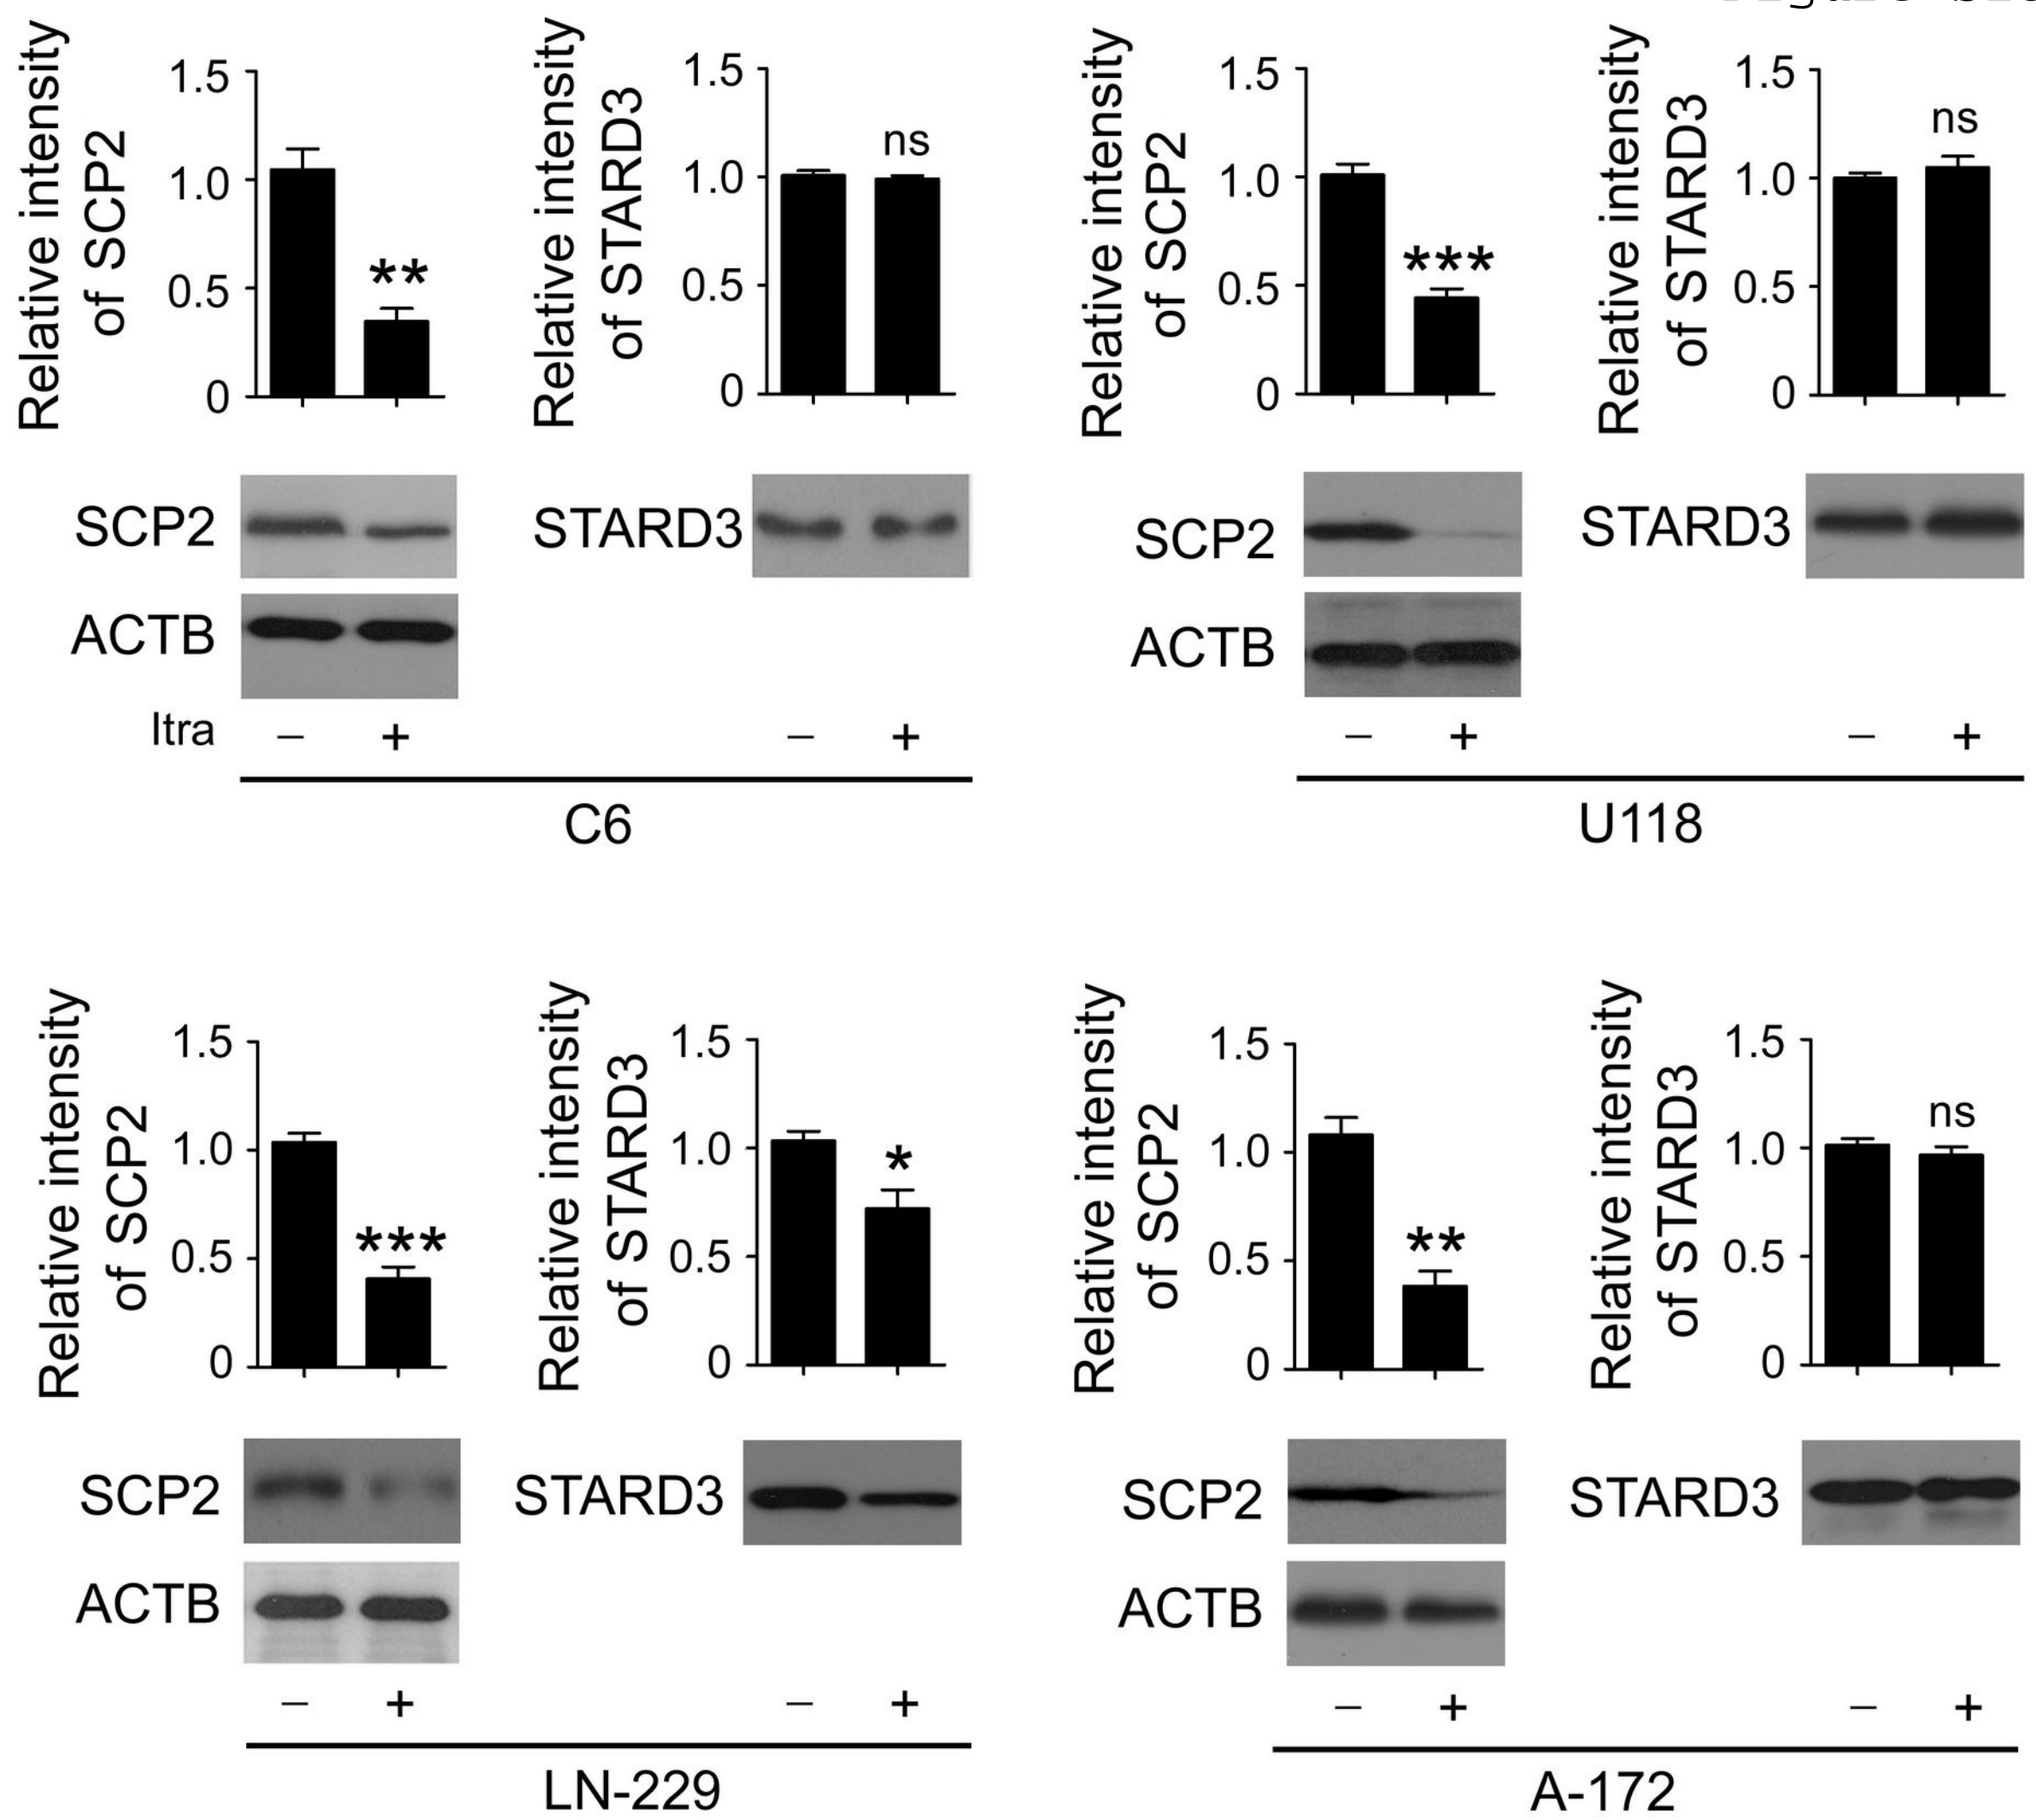

B

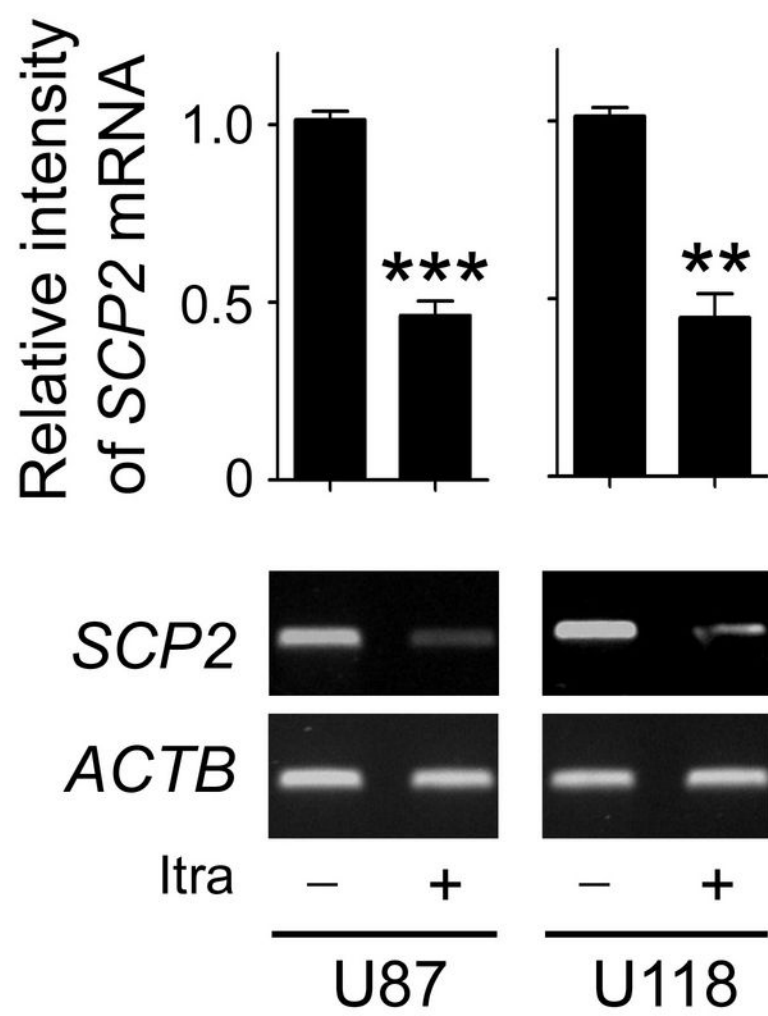

C

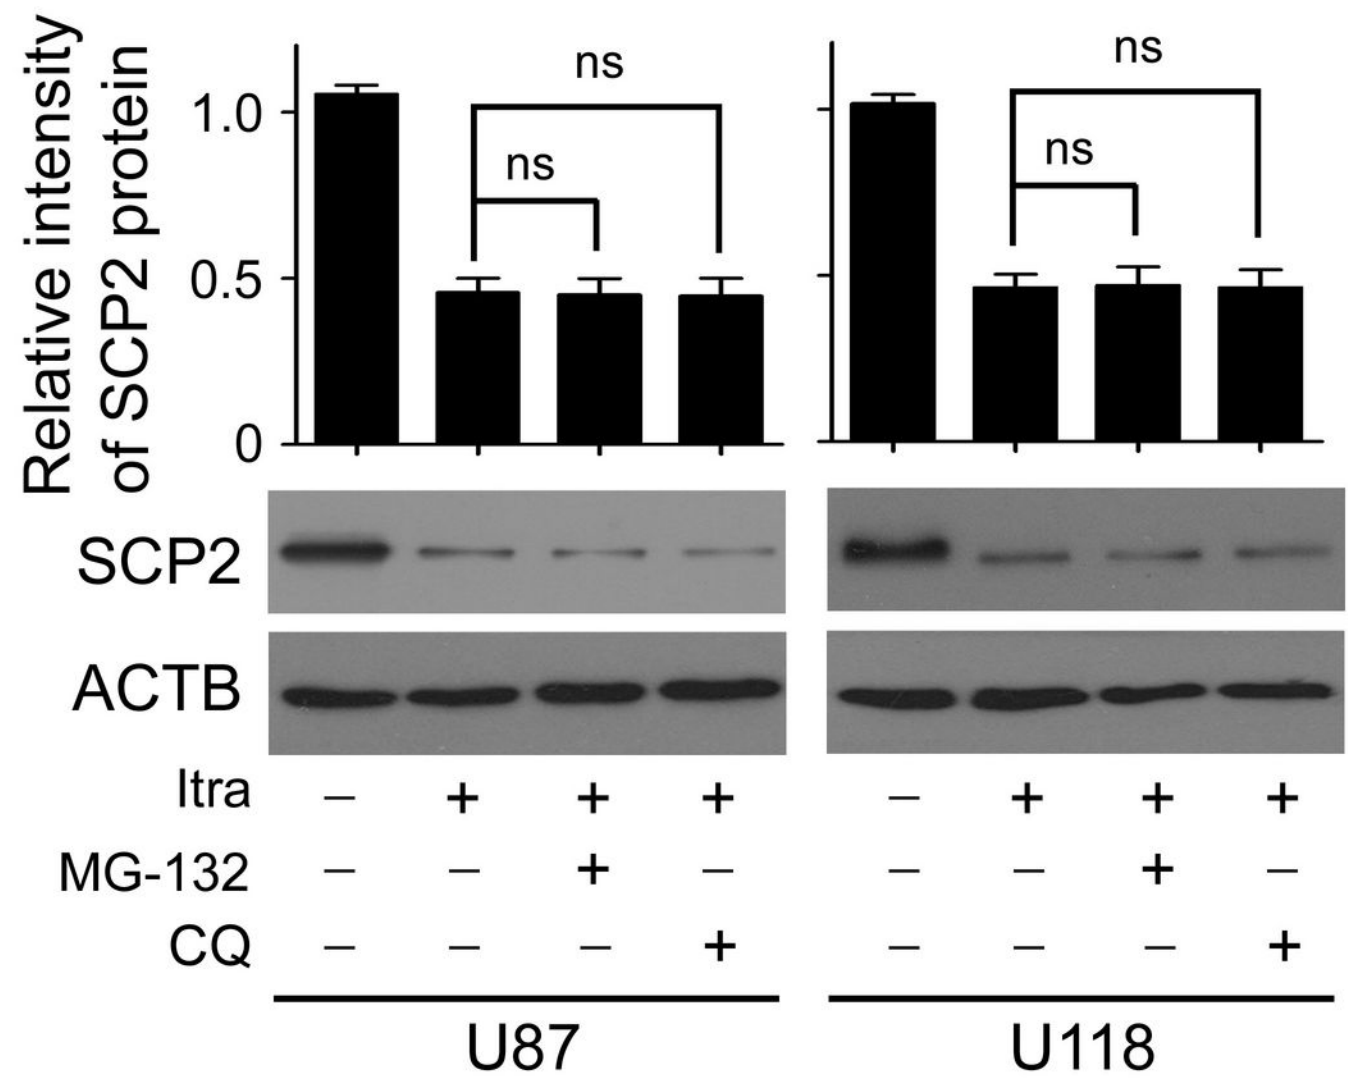



**A**

Figure S16

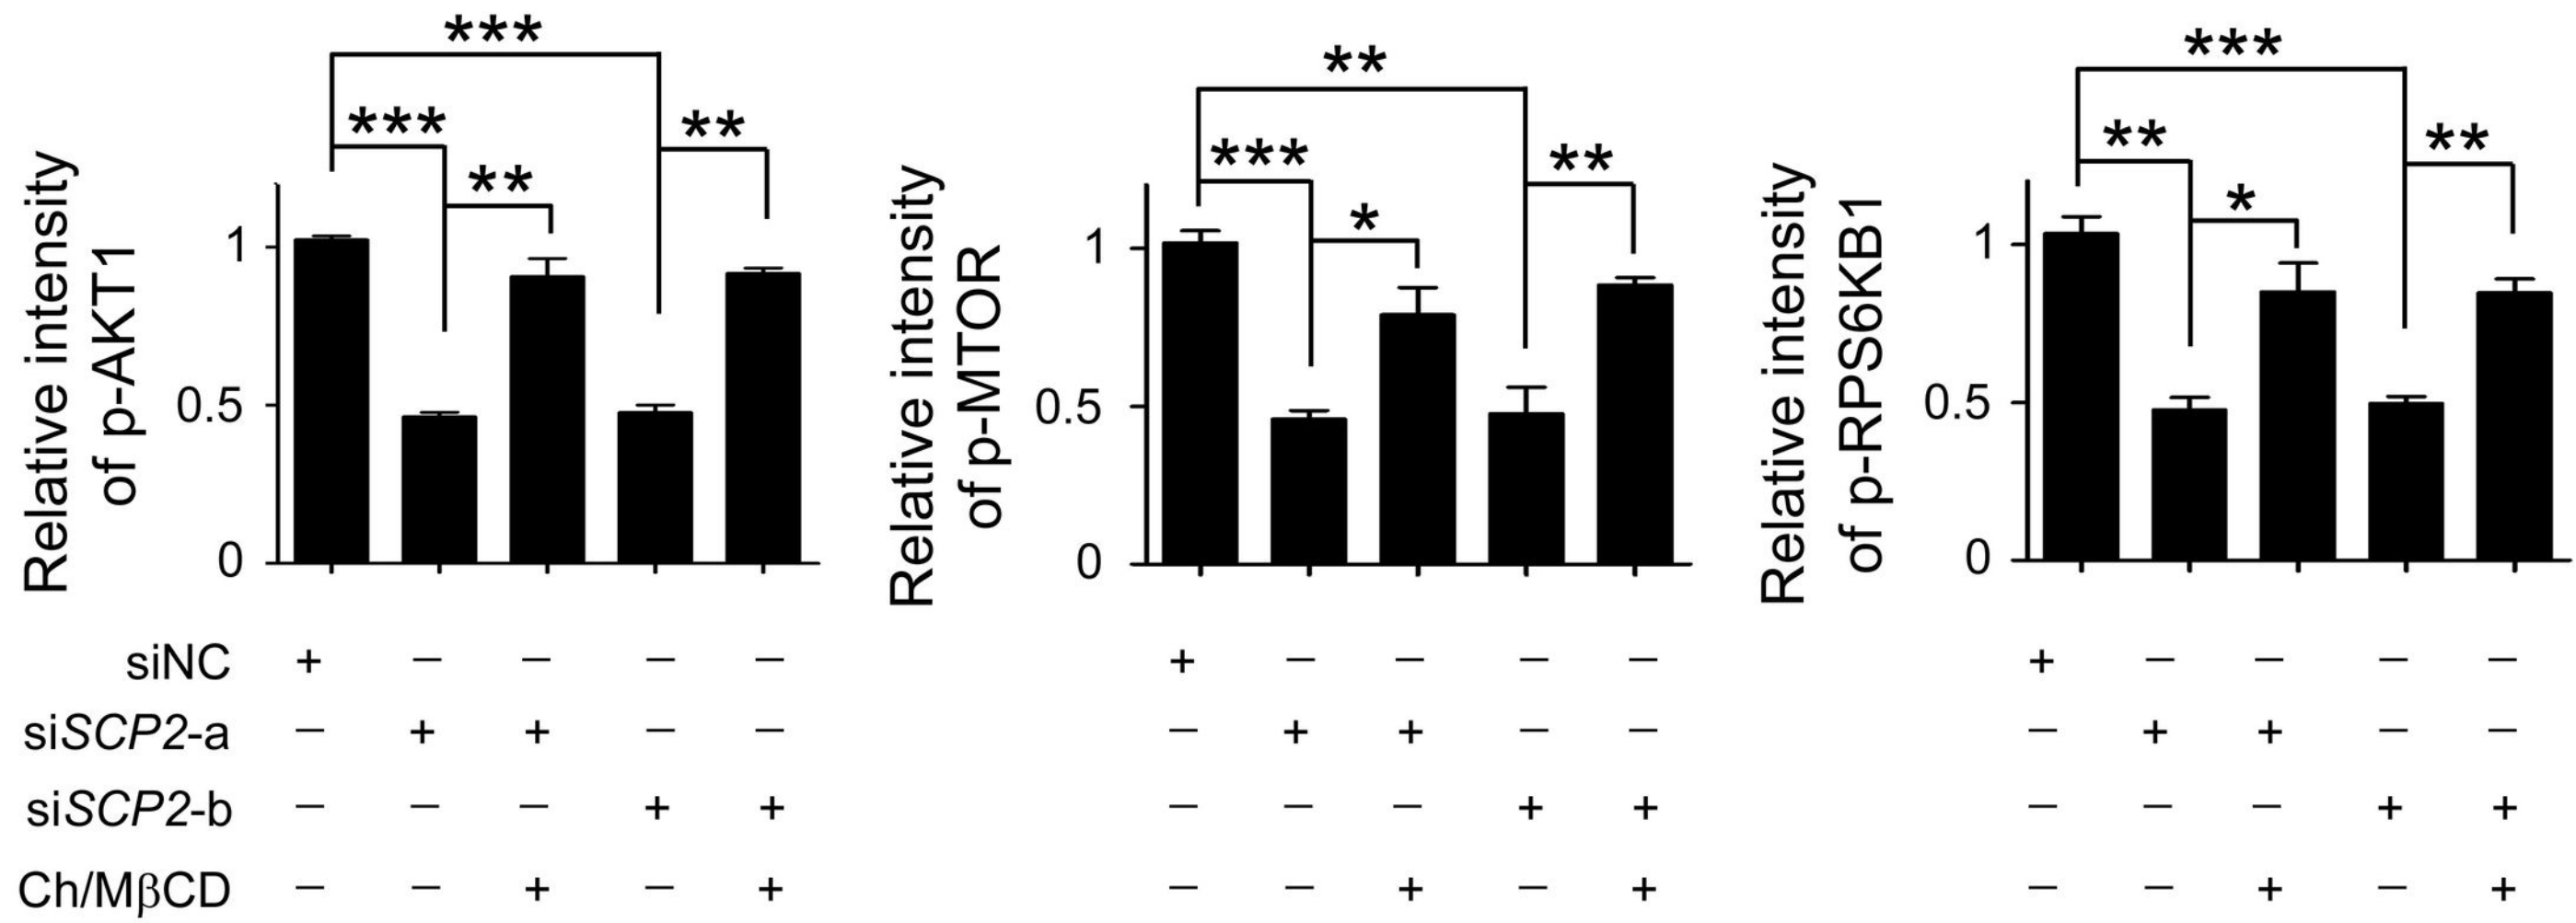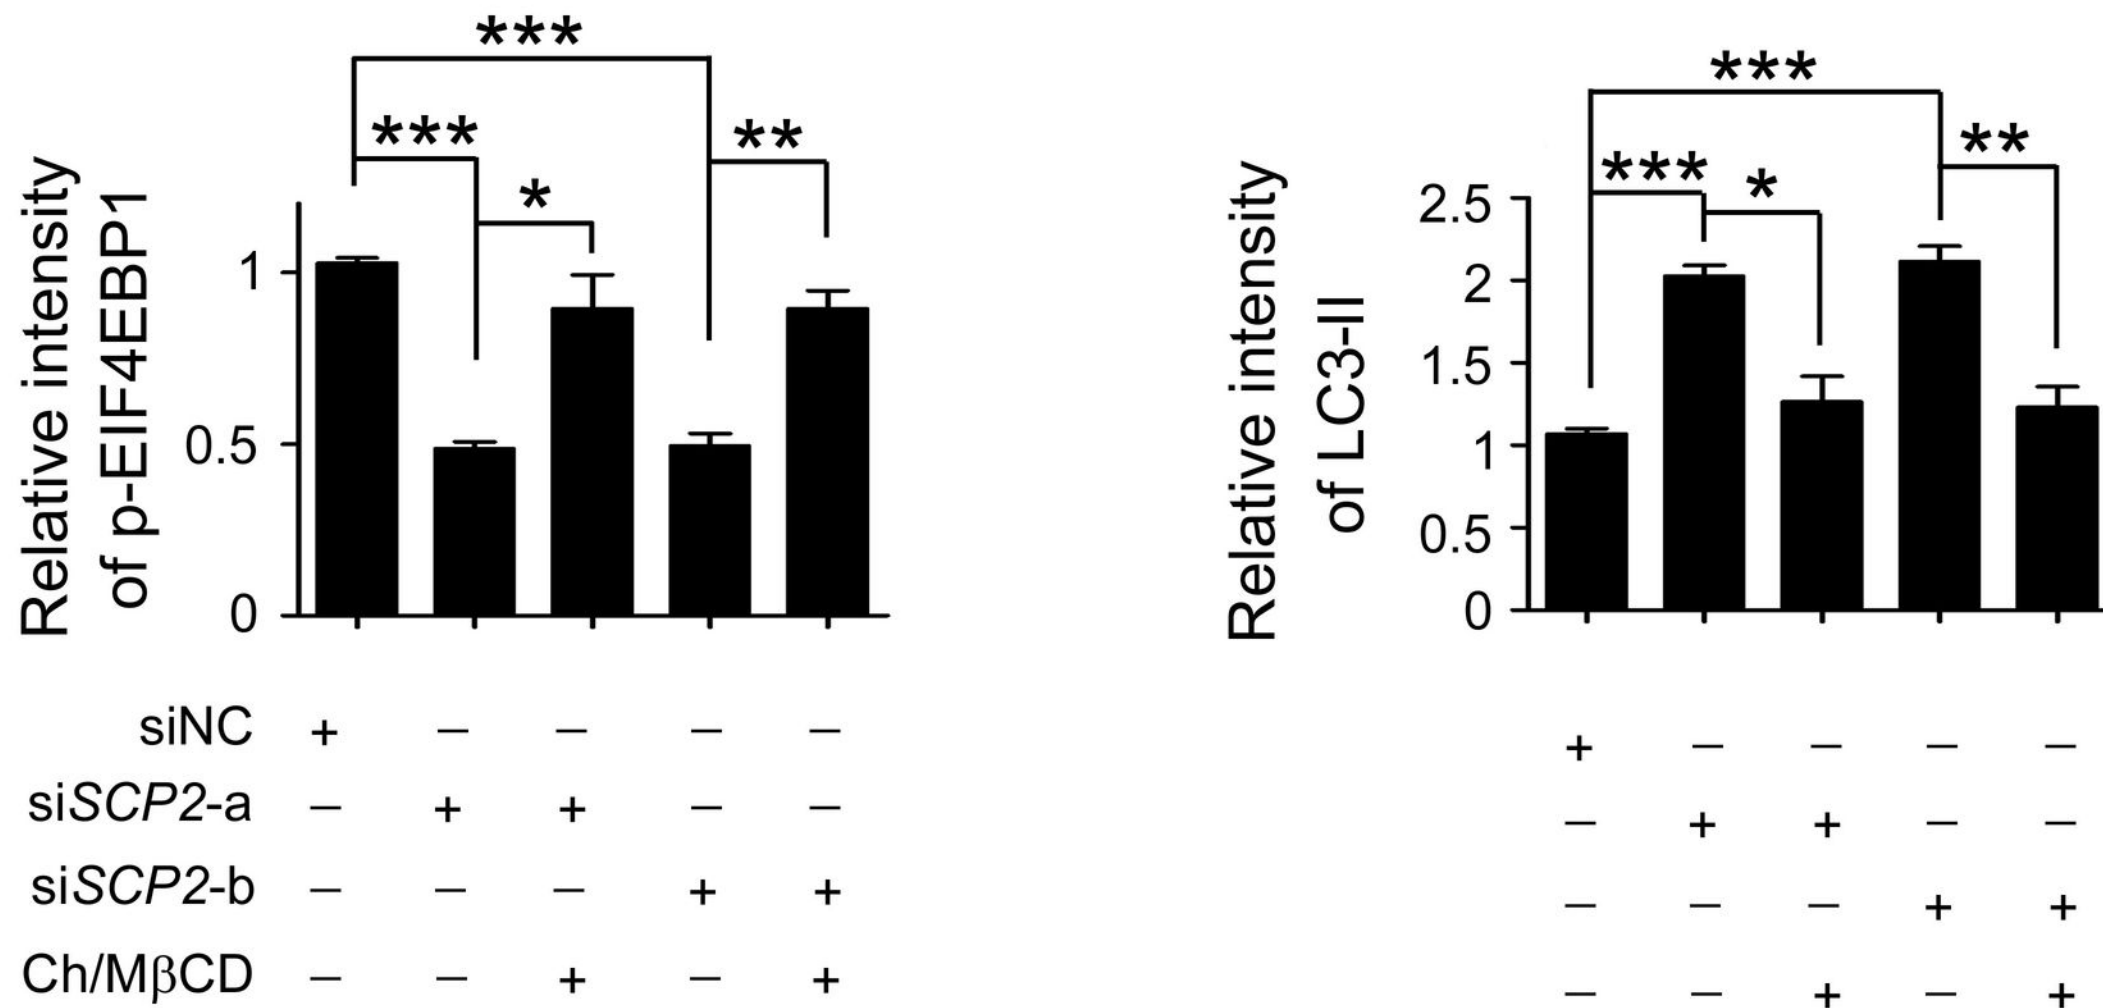**B**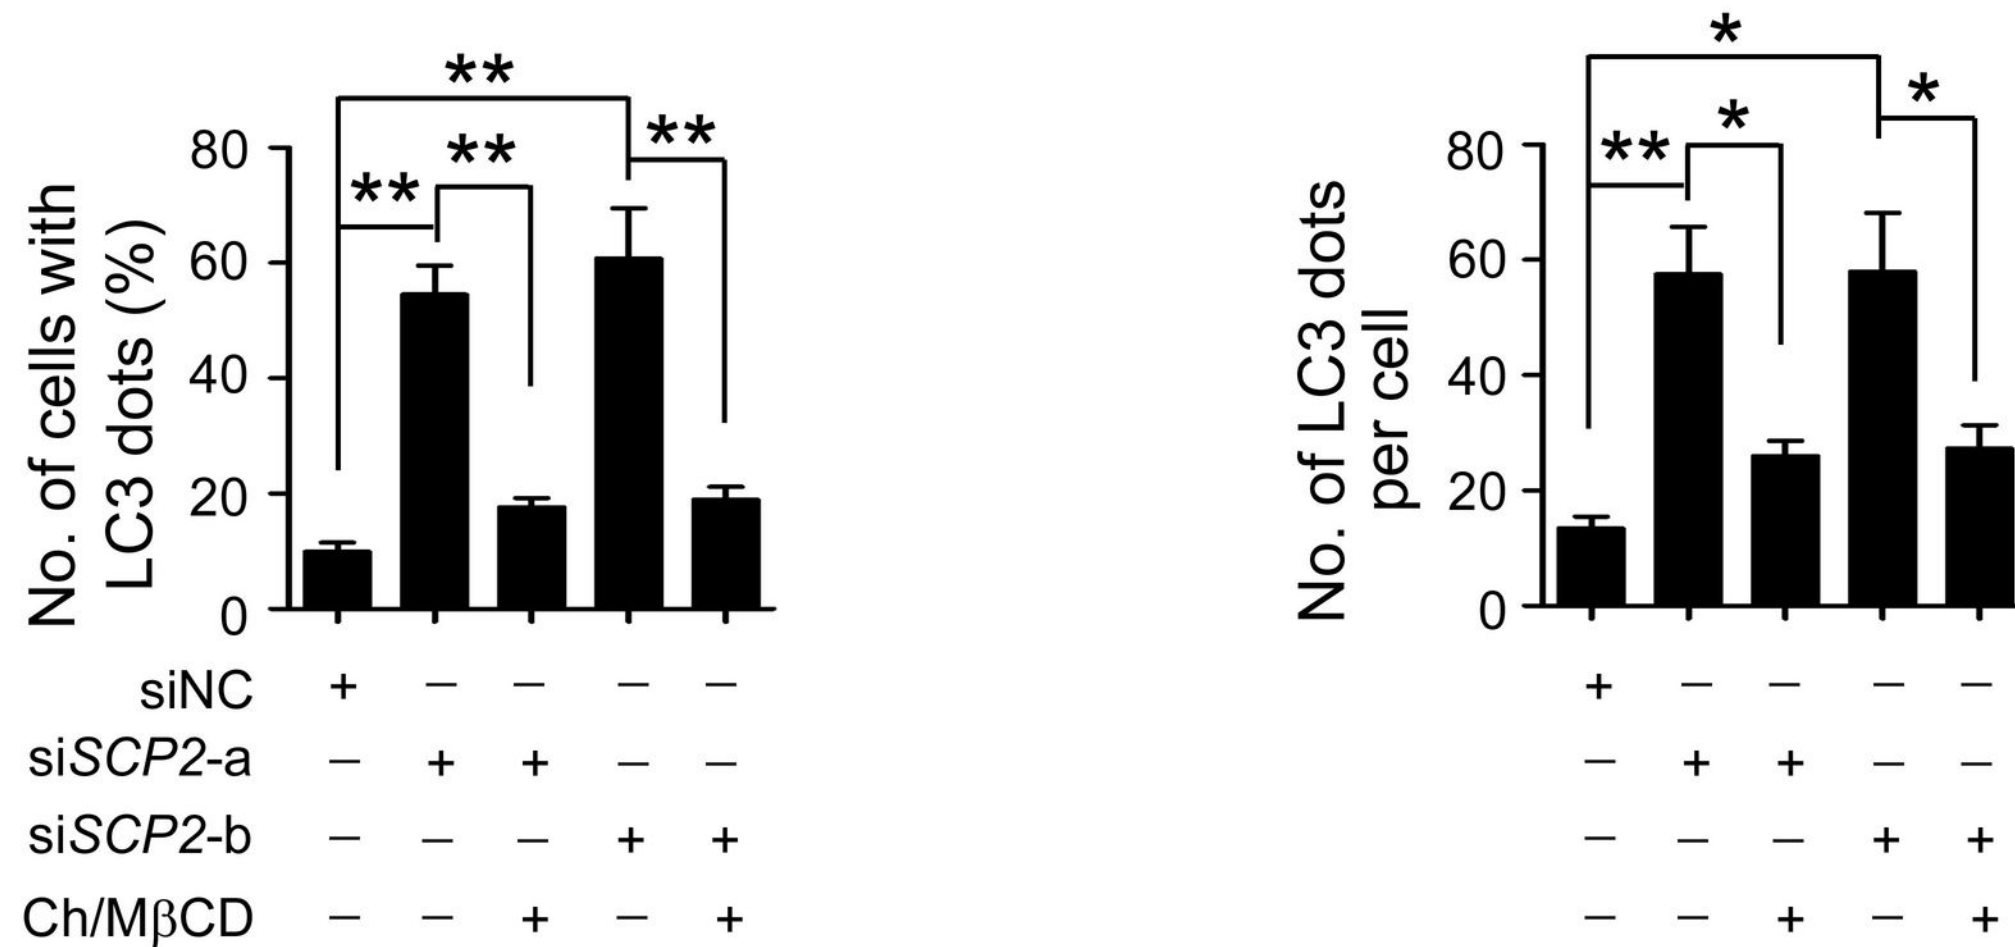

Figure S17

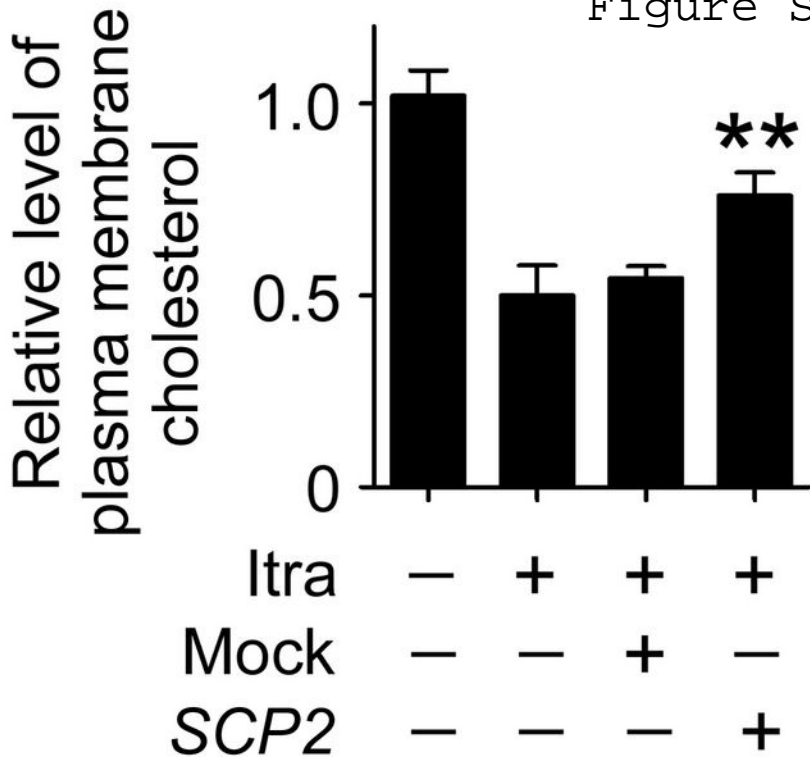

A

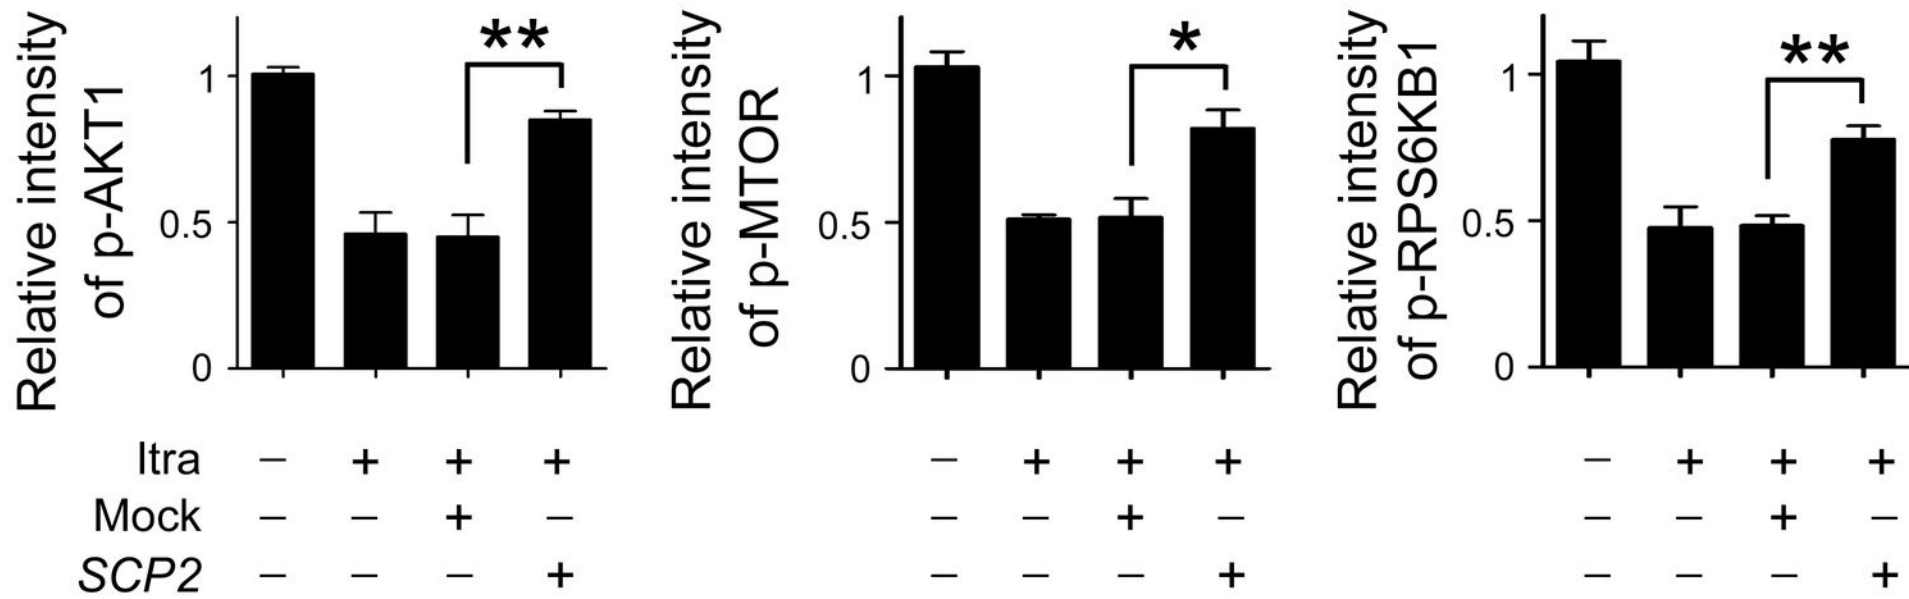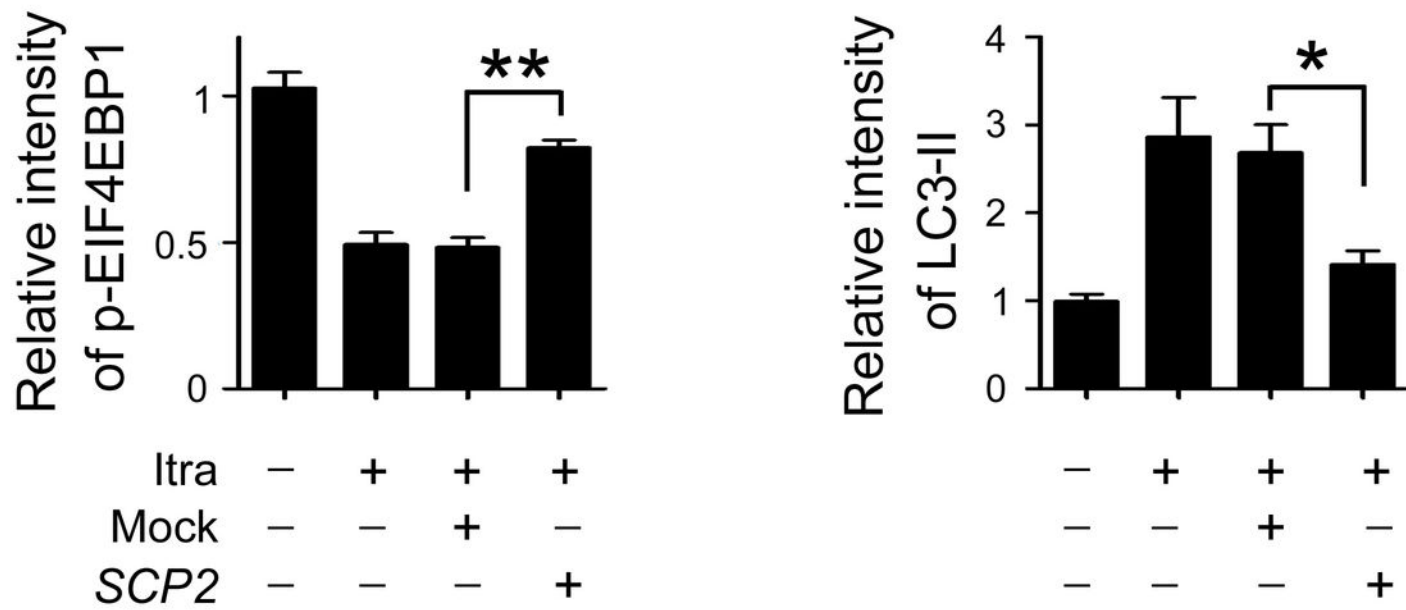

B

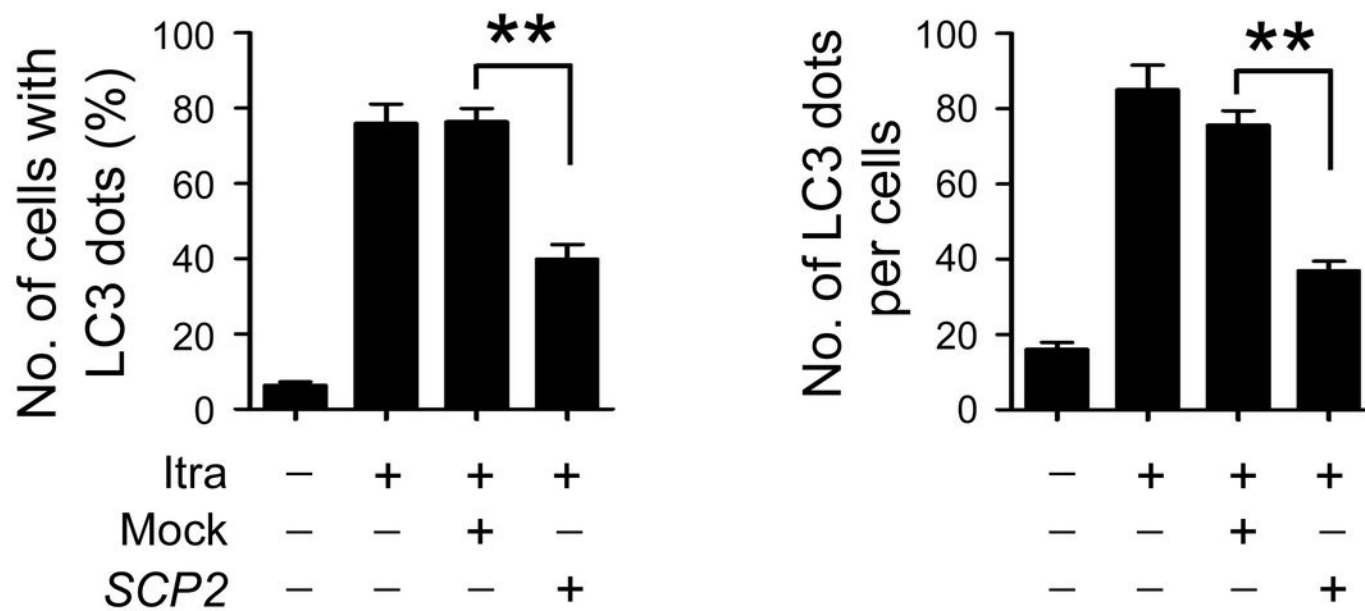

**Figure S1.** Itraconazole induces G1/S arrest in glioblastoma cell lines. U87 or C6 Cells were treated with DMSO or 5  $\mu$ M itraconazole for 36 h, cell cycle was examined by flow cytometry. The data are representative of 5 independent experiments.

**Figure S2.** Itraconazole does not induce apoptosis in glioblastoma cell lines cells. U87 or C6 cells were treated with DMSO, 2 or 5  $\mu$ M itraconazole for 36 h. **(A)** Cell apoptosis was examined by flow cytometry. Dot plot display of ANXA5 FITC-fluorescence versus PI fluorescence shown on a logarithmic scale. Early or late apoptotic cells were defined as ANXA5-positive and PI-negative cells (lower right quadrant) or ANXA5-positive and PI-positive (upper right quadrant), respectively. The data are representative of 3 independent experiments. **(B)** Cell apoptosis was examined by TUNEL assay. The TUNEL-positive cells were counted from at least 100 random fields. The data are representative of 3 independent experiments. ns, not significant; Itra, itraconazole.

**Figure S3.** Itraconazole induces formation of LC3 puncta. **(A)** U87 cells were transfected with a pEGFP-LC3 plasmid. After 36 h, cells were treated with DMSO or the indicated concentrations of itraconazole for another 36 h. Formation of EGFP-LC3 puncta was visualized by fluorescence microscopy. Cells were defined as positive if they had 5 or more EGFP-LC3 puncta in the cytoplasm. The percentage of the cells with EGFP-LC3 puncta and the average number of EGFP-LC3 puncta were

analyzed from at least 100 random fields. The data are representative of 3 independent experiments. **(B)** U87 cells were treated with the indicated concentrations of itraconazole for 36 h, and formation of endogenous LC3 puncta was examined via immunofluorescence staining using a fluorescence microscope. Cells were defined as positive if they had 5 or more endogenous LC3 puncta in the cytoplasm. The percentage of the cells with endogenous LC3 puncta and the average number of endogenous LC3 puncta were analyzed from at least 100 random fields. The data are representative of 3 independent experiments. \*\*,  $P < 0.01$ ; \*\*\*,  $P < 0.01$ ; Itra, itraconazole.

**Figure S4.** Itraconazole induces formation of autophagic vacuoles. **(A)** U87 cells were treated with DMSO or 5  $\mu$ M itraconazole for 36 h, and formation of autophagic vacuoles was examined by TEM analysis. The ultrastructures were analyzed from at least 100 randomly chosen fields. The data are representative of 3 independent experiments. **(B)** C6 cells were treated with DMSO or the indicated concentrations of 5  $\mu$ M itraconazole for 36 h, and formation of autophagic vacuoles was examined by TEM analysis. The ultrastructures were analyzed from at least 100 randomly chosen fields. The data are representative of 3 independent experiments. \*\*,  $P < 0.01$ ; Itra, itraconazole.

**Figure S5.** Itraconazole induces the accumulation of LC3-II and the degradation of SQSTM1. **(A)** U87 cells were treated with DMSO or the indicated concentrations of

itraconazole for 12, 24 or 48 h. Lysosomal protease inhibitors (E64d and pepstatin A each at 10 µg/ml) were applied for 3 h at the end of treatment time. The conversion of LC3-I to LC3-II was examined by immunoblot. The data are representative of 3 independent experiments. **(B)** U87 cells were treated with DMSO or the indicated concentrations of itraconazole for 36 h. Lysosomal protease inhibitors (E64d and pepstatin A each at 10 µg/ml) were applied for 3 h at the end of treatment time. The conversion of LC3-I to LC3-II was examined by immunoblot. The data are representative of 3 independent experiments. **(C)** C6 cells were treated with DMSO or the indicated concentrations of itraconazole for 36 h. Lysosomal protease inhibitors (E64d and pepstatin A each at 10 µg/ml) were applied for 3 h at the end of treatment time of itraconazole. Conversion of LC3-I to LC3-II was examined by immunoblot. The data are representative of 3 independent experiments. **(D)** U87 cells were treated with DMSO or the indicated concentrations of itraconazole for 36 h, and expression of SQSTM1 was determined by immunoblot. The data are representative of 3 independent experiments. **(E)** C6 cells were treated with DMSO or the indicated concentrations of itraconazole for 36 h, and expression of SQSTM1 was determined by immunoblot. The data are representative of 3 independent experiments. \*,  $P < 0.05$ ; \*\*,  $P < 0.01$ ; Itra, itraconazole; ns, not significant.

**Figure S6.** Itraconazole promotes the formation of PtdIns3K-BECN1-ATG14 complexes. **(A to C)** U87 cells were treated with DMSO or 5 µM itraconazole for 36 h. Interaction between PtdIns3K and BECN1 **(A)**, BCL2 and BECN1 **(B)** or ATG14



and BECN1 (C) was examined by coimmunoprecipitation. The data are representative of 3 independent experiments. (D) Nude mice with U87 subcutaneous tumor xenografts were treated with hydroxypropyl-cyclodextrin (vehicle, n = 9) or itraconazole 75 mg/kg (n = 9) twice daily by oral gavage for 3 weeks. The conversion of LC3-I to LC3-II in tumor tissues was examined by immunoblot. The relative intensity of LC3-II in vehicle- or itraconazole-treated groups is shown. The data were obtained from 3 independent experiments for each tumor. \*,  $P < 0.05$ ; Itra, itraconazole.

**Figure S7.** Inhibition of autophagy represses the antiproliferative effect of itraconazole. (A) U87 cells were transfected with siNC (negative control) or siATG5 for 72 h, and expression of ATG5 was examined by immunoblot. The data are representative of 3 independent experiments. (B) U87 cells were transfected with siNC or siATG5 for 36 h, and then treated with 5  $\mu$ M itraconazole for another 36 h. Expression of ATG5 was examined by immunoblot. The data are representative of 3 independent experiments. (C) U87 cells were transfected with siNC or siBECN1 for 72 h, and expression of BECN1 was examined by immunoblot. The data are representative of 3 independent experiments. (D) U87 cells were transfected with siNC or siBECN1 for 36 h, and then treated with DMSO or 5  $\mu$ M itraconazole for another 36 h. Expression of BECN1 was examined by immunoblot. The data are representative of 3 independent experiments. (E and F) U87 cells were transfected with siNC, siATG5 or siBECN1 for 36 h, and then treated with 5  $\mu$ M itraconazole for

another 36 h. Cell proliferation was examined by colony formation assay (**E**) and BrdU incorporation assay (**F**). The data are representative of 3 independent experiments for both colony formation assay and BrdU incorporation assay. \*,  $P < 0.05$ ; \*\*,  $P < 0.01$ ; \*\*\*,  $P < 0.001$ ; Itra, itraconazole.

**Figure S8.** Itraconazole induces autophagy through inhibition of the AKT1-MTOR pathway. (**A**) U87 or C6 cells were treated with DMSO or the indicated concentrations of itraconazole for 36 h. Phosphorylation of MAPK1/3, MAPK11/13/14 or MAPK8/9 was examined by immunoblot. Total MAPK1/3, MAPK11/12/14 or MAPK8/9 was used as internal control, respectively. The data are representative of 3 independent experiments. (**B**) U87 cells were transfected with mock vector or ca-*AKT1*. 36 h after transfection, the cells were treated with DMSO or 5  $\mu$ M itraconazole for another 36 h. Expression of ca-*AKT1* and phosphorylation of MTOR (Ser2448), CDKN1A (Thr145) and CDKN1B (Thr198) was examined by immunoblots. ACTB was used as the internal control for ca-*AKT1*. Total MTOR, RPS6KB1 or EIF4EBP1 respectively was used as the internal control. The data are representative of 3 independent experiments. (**C**) U87 cells were transfected with mock vector or ca-*AKT1*. 36 h after transfection, the cells were treated with DMSO or 5  $\mu$ M itraconazole for another 36 h. Formation of endogenous LC3 puncta were examined by immunofluorescence staining using a fluorescence microscope. Cells were defined as positive if they had 5 or more endogenous LC3 puncta in the cytoplasm. The percentage of the cells with endogenous LC3 puncta and the average

number of endogenous LC3 puncta were analyzed from at least 100 random fields. The data are representative of 3 independent experiments. **(D)** U87 cells were transfected with mock vector, ca-*AKT1*, siNC (negative control) or si*BECN1*. 36 h after transfection, the cells were treated with DMSO or 5  $\mu$ M itraconazole for another 36 h. Cell cycle was analyzed by flow cytometry. The data are representative of 3 independent experiments. \*,  $P < 0.05$ ; \*\*,  $P < 0.01$ ; Itra, itraconazole.

**Figure S9.** Itraconazole induces the redistribution of cellular cholesterol. **(A)** U87 or C6 cells were treated with DMSO or 5  $\mu$ M itraconazole for 36 h, and the plasma membrane fraction isolated. The level of GAPDH, ATP1A1 and MT-CO1 in the plasma membrane fraction and whole cell lysate was examined by immunoblot. Equal amounts of protein from the plasma membrane fraction or whole cell lysate were loaded for immunoblot. The data are representative of 3 independent experiments. PM, plasma membrane; WCL, whole cell lysate. **(B)** U87 cells were treated with DMSO or 5  $\mu$ M itraconazole for 36 h. Cellular cholesterol distribution was determined by filipin staining coupled with CAV1 or PDIA immunofluorescence staining. The data are representative of 3 independent experiments.

**Figure S10.** M $\beta$ CD-cholesterol complex replenishes the membrane cholesterol content. **(A)** U87 (left panel) or C6 (right panel) cells were treated with DMSO or itraconazole (5  $\mu$ M) in the presence or absence of the M $\beta$ CD-cholesterol complex (containing 1 mg/ml M $\beta$ CD and 20  $\mu$ g/ml cholesterol) for 36 h. The plasma

membrane fraction was isolated by sucrose density gradient centrifugation, and the level of cholesterol in the plasma membrane examined using the Cholesterol Assay Kit. The data are representative of 4 independent experiments. **(B)** U87 cells were treated with DMSO or itraconazole (5  $\mu$ M) in the presence or absence of the M $\beta$ CD-cholesterol complex (containing 1 mg/ml M $\beta$ CD and 20  $\mu$ g/ml cholesterol) or rapamycin (100 nM) for 36 h. Phosphorylation of MTOR (Ser2448), RPS6KB1 (Ser424 and Thr421) and EIF4EBP1 (Ser65 and Thr70), and conversion of LC3-I to LC3-II were examined by immunoblot. Total MTOR, RPS6KB1 or EIF4EBP1 was used as internal control for p-MTOR, p-RPS6KB1 or p-EIF4EBP1, respectively. ACTB was used as the internal control for LC3. The data are representative of 3 independent experiments. \*,  $P < 0.05$ ; \*\*,  $P < 0.01$ ; \*\*\*,  $P < 0.001$ ; Itra, itraconazole; Ch/M $\beta$ CD, M $\beta$ CD-cholesterol complex; Rapa, rapamycin; ns, not significant.

**Figure S11.** Itraconazole-induced cholesterol redistribution inhibits the AKT1-MTOR pathway in U87 cell line. U87 cells were treated with itraconazole (5  $\mu$ M) in the presence of M $\beta$ CD (1 mg/ml), cholesterol (20  $\mu$ g/ml) or the M $\beta$ CD-cholesterol complex (containing 1 mg/ml M $\beta$ CD and 20  $\mu$ g/ml cholesterol) for 36 h. Phosphorylation of AKT1 (Ser473), MTOR (Ser2448), RPS6KB1 (Ser424 and Thr421) and EIF4EBP1 (Ser65 and Thr70) was examined by immunoblot. Total AKT1, MTOR, RPS6KB1 or EIF4EBP1 was used as internal control for p-AKT1, p-MTOR, p-RPS6KB1 or p-EIF4EBP1, respectively. The data are representative of 3 independent experiments.

**Figure S12.** Itraconazole-induced cholesterol redistribution inhibits the AKT1-MTOR pathway in C6 cell line. **(A)** C6 cells were treated with DMSO or itraconazole (5  $\mu$ M) in the presence or absence of M $\beta$ CD (1 mg/ml), cholesterol (20  $\mu$ g/ml) and the M $\beta$ CD-cholesterol complex (containing 1 mg/ml M $\beta$ CD and 20  $\mu$ g/ml cholesterol) for 36 h. Phosphorylation of AKT1 (Ser473), MTOR (Ser2448), RPS6KB1 (Ser424 and Thr421) and EIF4EBP1 (Ser65 and Thr70) was examined by immunoblot. Total AKT1, MTOR, RPS6KB1 or EIF4EBP1 was used as internal control for p-AKT1, p-MTOR, p-RPS6KB1 or p-EIF4EBP1, respectively. The data are representative of 3 independent experiments. **(B)** U87 cells were treated with itraconazole (5  $\mu$ M) for 36 h, washed with PBS, and then incubated with the M $\beta$ CD-cholesterol complex (containing 2 mg/ml M $\beta$ CD and 80  $\mu$ g/ml cholesterol) for 4 h. Phosphorylation of AKT1 (Ser473), MTOR (Ser2448), RPS6KB1 (Ser424 and Thr421) and EIF4EBP1 (Ser65 and Thr70) was examined by immunoblot. Total AKT1, MTOR, RPS6KB1 or EIF4EBP1 was respectively used as internal control. The data are representative of 3 independent experiments. \*,  $P < 0.05$ ; \*\*,  $P < 0.01$ ; \*\*\*,  $P < 0.001$ ; ns, not significant; Ch/M $\beta$ CD, M $\beta$ CD-cholesterol complex; Itra, itraconazole.

**Figure S13.** Itraconazole induces autophagy via triggering cholesterol redistribution. **(A)** U87 cells were treated with itraconazole (5  $\mu$ M) in the presence of M $\beta$ CD (1 mg/ml), cholesterol (20  $\mu$ g/ml) or the M $\beta$ CD-cholesterol complex (containing 1 mg/ml M $\beta$ CD and 20  $\mu$ g/ml cholesterol) for 36 h. Conversion of LC3-I to LC3-II was examined by immunoblot. ACTB was used as the internal control for LC3. The data

are representative of 3 independent experiments. **(B)** C6 cells were treated with DMSO or itraconazole (5  $\mu$ M) in the presence or absence of M $\beta$ CD (1 mg/ml), cholesterol (20  $\mu$ g/ml) and the M $\beta$ CD-cholesterol complex (containing 1 mg/ml M $\beta$ CD and 20  $\mu$ g/ml cholesterol) for 36 h. Conversion of LC3-I to LC3-II was examined by immunoblot. ACTB was used as the internal control for LC3. The data are representative of 3 independent experiments. **(C)** U87 cells were treated with itraconazole (5  $\mu$ M) in the presence or absence of the M $\beta$ CD-cholesterol complex (containing 1 mg/ml M $\beta$ CD and 20  $\mu$ g/ml cholesterol) for 36 h. Formation of endogenous LC3 puncta was examined via immunofluorescence staining using a fluorescence microscope. Cells were defined as positive if they had 5 or more endogenous LC3 puncta in the cytoplasm. The percentage of cells with endogenous LC3 puncta and the average number of endogenous LC3 puncta were analyzed from at least 100 random fields. The data are representative of 3 independent experiments. **(D)** U87 cells were treated with DMSO or 5  $\mu$ M itraconazole for 36 h in the presence or absence of the M $\beta$ CD-cholesterol complex (containing 1 mg/ml M $\beta$ CD and 20  $\mu$ g/ml cholesterol). The formation of autophagic vacuoles was examined by TEM. The ultrastructures of U87 cells were analyzed from at least 100 randomly chosen fields. The data are representative of 3 independent experiments. **(E)** U87 (left panel) or C6 (right panel) cells were treated with the indicated concentrations of U18666A. Cell viability was determined by the MTT assay. The data are representative of 3 independent experiments. \*,  $P < 0.05$ ; \*\*,  $P < 0.01$ ; ns, not significant; Ch/M $\beta$ CD, M $\beta$ CD-cholesterol complex; Itra, itraconazole.



**Figure S14.** Proteomic identification of the differentially expressed proteins in itraconazole-treated U87 cells. **(A)** U87 cells were treated with DMSO and 5  $\mu$ M itraconazole for 36 h. Total protein was extracted, separated on pH 3 to 10 nonlinear IPG strips in the first dimension followed by 12% SDS-PAGE in the second dimension, and visualized by CBB staining. Differentially expressed proteins were defined as statistically significant based on two criteria: 1) intensity changes  $>2$ -fold, and 2) observed in at least 3 of the 4 replicates. Gel spots were selected for *in situ* gel digestion and analyzed using ESI-Q-TOF tandem mass spectrometry. Representative paired 2-DE gels are shown. Two representative spots with altered expression are boxed and indicated as S and M. **(B)** Protein cluster map was generated using Cluster software. Proteins upregulated in itraconazole-treated U87 cells are shown in red, and the downregulated proteins are shown in green. The color intensity corresponds to the degree of alteration as indicated by the color strip at the bottom. **(C)** The corresponding protein spots of SCPX (the SCP2 precursor) and STARD3 in the 2-DE gels are boxed and enlarged. The relative intensity of the protein spots was measured and compared using PDQuest software. \*\*,  $P < 0.01$ .

**Figure S15.** Itraconazole inhibits *SCP2* transcription. **(A)** C6, U118, LN-229 and A-172 cells were treated with DMSO or 5  $\mu$ M itraconazole for 36 h, expression of *SCP2* and *STARD3* was examined by immunoblot. The data are representative of 3 independent experiments. **(B)** U87 or U118 cells were treated with DMSO or 5  $\mu$ M

itraconazole for 36 h, and expression of *SCP2* was examined by semi-quantitative RT-PCR. *ACTB* was used as the internal control. The data are representative of 3 independent experiments. (C) U87 or U118 cells were treated with DMSO or 5  $\mu$ M itraconazole for 36 h. 10  $\mu$ M chloroquine or 10  $\mu$ M MG-132 was added in the culture for the last 6 h. Expression of *SCP2* was examined by immunoblot. *ACTB* was used as the internal control. The data are representative of 3 independent experiments. CQ, chloroquine. ns, not significant; \*,  $P < 0.05$ ; \*\*,  $P < 0.01$ ; \*\*\*,  $P < 0.001$ ; Itra, itraconazole.

**Figure S16.** Loss of *SCP2* expression inhibits AKT1/MTOR pathway and induces autophagy. (A) U87 cells were transfected with siNC, si*SCP2*-a or si*SCP2*-b. 36 h after transfection, the cells were incubated with fresh medium or medium containing the M $\beta$ CD-cholesterol complex (containing 1 mg/ml M $\beta$ CD and 20  $\mu$ g/ml cholesterol) for another 36 h. Phosphorylation of AKT1 (Ser473), MTOR (Ser2448), RPS6KB1 (Ser424 and Thr421) and EIF4EBP1 (Ser65 and Thr70) and conversion of LC3-I to LC3-II were examined by immunoblot. Total AKT1, MTOR, RPS6KB1 or EIF4EBP1 was used as internal control for p-AKT1, p-MTOR, p-RPS6KB1 or p-EIF4EBP1, respectively. *ACTB* was used as the internal control for LC3. The data are representative of 3 independent experiments. (B) U87 cells were transfected with siNC, si*SCP2*-a or si*SCP2*-b. 36 h after transfection, the cells were incubated with fresh medium or medium containing the M $\beta$ CD-cholesterol complex (containing 1 mg/ml M $\beta$ CD and 20  $\mu$ g/ml cholesterol) for another 36 h. Formation of endogenous

LC3 puncta was examined via immunofluorescence staining using a fluorescence microscope. Cells were defined as positive if they had 5 or more endogenous LC3 puncta in the cytoplasm. The percentage of the cells with endogenous LC3 puncta and the average number of endogenous LC3 puncta were analyzed from at least 100 random fields. The data are representative of 3 independent experiments. \*,  $P < 0.05$ ; \*\*,  $P < 0.01$ ; \*\*\*,  $P < 0.001$ ; ns, not significant; Ch/M $\beta$ CD, M $\beta$ CD-cholesterol complex.

**Figure S17.** Overexpression of SCP2 increases the plasma cholesterol content in itraconazole-treated cells. U87 cells were transfected with mock plasmid or SCP2 plasmid. 36 h after transfection, the cells were treated with DMSO or 5  $\mu$ M itraconazole for 36 h. The plasma membrane fraction was isolated by sucrose density gradient centrifugation, and the level of cholesterol in plasma membrane was examined using the Cholesterol Assay Kit. The data are representative of 4 independent experiments. \*\*,  $P < 0.01$ ; Itra, itraconazole.

**Figure S18.** Overexpression of SCP2 attenuates itraconazole-mediated MTOR inhibition and autophagy activation. U87 cells were transfected with mock vector or a SCP2 expression plasmid. After 36 h, cells were treated with DMSO or 5  $\mu$ M itraconazole for another 36 h. (A) Phosphorylation of AKT1 (Ser473), MTOR (Ser2448), RPS6KB1 (Ser424 and Thr421) and EIF4EBP1 (Ser65 and Thr70) and conversion of LC3-I to LC3-II were examined by immunoblot. Total AKT1, MTOR,

RPS6KB1 or EIF4EBP1 was used as internal control for p-AKT1, p-MTOR, p-RPS6KB1 or p-EIF4EBP1, respectively. ACTB was used as the internal control for LC3. The data are representative of 3 independent experiments. **(B)** Formation of endogenous LC3 puncta was examined via immunofluorescence staining using a fluorescence microscope. Cells were defined as positive if they had 5 or more endogenous LC3 puncta in the cytoplasm. The percentage of the cells with endogenous LC3 puncta and the average number of endogenous LC3 puncta were analyzed from at least 100 random fields. The data are representative of 3 independent experiments. \*,  $P < 0.05$ ; \*\*,  $P < 0.01$ ; Itra, itraconazole.

**Table S1.** Data of 26 proteins identified by ESI-Q-TOF.

| <b>Accession No.</b> | <b>Protein description</b>                              | <b>Gene name</b> | <b>Compute MW/pI<sup>a</sup></b> | <b>Expression level<sup>b</sup></b> |
|----------------------|---------------------------------------------------------|------------------|----------------------------------|-------------------------------------|
| P19623               | Spermidine synthase                                     | SRM              | 33824.68 / 5.30                  | -                                   |
| O00299               | chloride intracellular channel 1                        | CLIC1            | 26791.54 / 5.09                  | -                                   |
| P08758               | Annexin A5                                              | ANXA5            | 35805.58/ 4.93                   | -                                   |
| P11177               | Pyruvate dehydrogenase (lipoamide) beta                 | PDHB             | 35904.41/ 5.38                   | +                                   |
| P22307               | Sterol carrier protein 2                                | SCP2             | 58993.62/6.44                    | -                                   |
| Q07955               | Serine/arginine-rich splicing factor 1                  | SRSF1            | 27613.39/ 10.37                  | -                                   |
| Q15185               | Prostaglandin E synthase 3 (cytosolic)                  | PTGES3           | 18697.38/4.32                    | -                                   |
| Q96C19               | EF-hand domain family, member D2                        | EFHD2            | 26566.09 / 5.15                  | -                                   |
| P08779               | Keratin 16                                              | KRT16            | 51136.63 / 4.98                  | +                                   |
| P25789               | Proteasome (prosome, macropain) subunit alpha type, 4   | PSMA4            | 29483.81 / 7.58                  | +                                   |
| Q14849               | StAR-related lipid transfer (START) domain containing 3 | STARD3           | 50502.14/8.53                    | +                                   |
| P14625               | Heat shock protein 90kDa beta (Grp94), member 1         | HSP90B1          | 90177.99 / 4.73                  | -                                   |
| P15531               | NME/NM23 nucleoside diphosphate kinase 1                | NME1             | 17017.53 / 5.82                  | -                                   |
| P60604               | Ubiquitin-conjugating enzyme E2G 2                      | UBE2G2           | 18566.31 /4.62                   | -                                   |
| P08670               | Vimentin                                                | VIM              | 53520.49/5.05                    | -                                   |
| P35914               | 3-Hydroxymethyl-3-methylglutaryl-CoA                    | HMGCL            | 31546.68 /7.48                   | +                                   |

|               | lyase                                                                                                   |                  |                        |          |
|---------------|---------------------------------------------------------------------------------------------------------|------------------|------------------------|----------|
| <b>O14950</b> | <b>Myosin, light chain 12B, regulatory</b>                                                              | <b>MYL12B</b>    | <b>19647.97/4.69</b>   | <b>-</b> |
| <b>P33778</b> | <b>Histone cluster 1, H2bb</b>                                                                          | <b>HIST1H2BB</b> | <b>13819.00/10.32</b>  | <b>-</b> |
| <b>P09382</b> | <b>Lectin, galactoside-binding, soluble, 1</b>                                                          | <b>LGALS1</b>    | <b>14584.51 /5.30</b>  | <b>+</b> |
| <b>O75947</b> | <b>ATP synthase, H+ transporting,<br/>mitochondrial Fo complex, subunit d</b>                           | <b>ATP5H</b>     | <b>18360.02/5.22</b>   | <b>+</b> |
| <b>P62310</b> | <b>LSM3 homolog, U6 small nuclear RNA<br/>associated (<i>S. cerevisiae</i>)</b>                         | <b>LSM3</b>      | <b>11714.22 /4.58</b>  | <b>-</b> |
| <b>P20674</b> | <b>Cytochrome c oxidase subunit Va</b>                                                                  | <b>COX5A</b>     | <b>12501.17 /4.88</b>  | <b>+</b> |
| <b>P07737</b> | <b>Profilin 1</b>                                                                                       | <b>PFN1</b>      | <b>14923.04 / 8.47</b> | <b>-</b> |
| <b>P63104</b> | <b>tyrosine 3-monooxygenase/tryptophan<br/>5-monooxygenase activation protein, zeta</b>                 | <b>YWHAZ</b>     | <b>27745.10 / 4.73</b> | <b>-</b> |
| <b>P25705</b> | <b>ATP synthase, H+ transporting,<br/>mitochondrial F1 complex, alpha subunit<br/>1, cardiac muscle</b> | <b>ATP5A1</b>    | <b>55209.32 / 8.28</b> | <b>+</b> |
| <b>Q99714</b> | <b>Hydroxysteroid (17-beta) dehydrogenase<br/>10</b>                                                    | <b>HSD17B10</b>  | <b>26791.89 /7.87</b>  | <b>+</b> |

a) Theoretical molecular mass (kDa) and pI from the ExPASy database.

b) Expression level in 2-DE analysis upon itraconazole treatment for 36 h compared with control (+, increase; -,decrease).
